# Supplementary material
Source: PubMed Central journal article supplement (PMC4569884)

# **Structural Optimization of Indole Derivatives Acting at Colchicine Binding Site as Potential Anticancer Agents**

Dong-Jin Hwang,<sup>†,‡</sup> Jin Wang,<sup>†,‡</sup> Wei Li,<sup>\*,†</sup> Duane D. Miller<sup>\*,†</sup>

<sup>†</sup> Department of Pharmaceutical Sciences, University of Tennessee, Health Science Center, Memphis, Tennessee 38163, United States; <sup>‡</sup> These authors contributed equally

## **Table of Contents**

|                                                                               |              |
|-------------------------------------------------------------------------------|--------------|
| <b>1. Experimental Section</b>                                                | <b>2</b>     |
| <b>2. Structures of known colchicine inhibitors: Figure S1</b>                | <b>9</b>     |
| <b>3. Molecular Modeling: Figure S2</b>                                       | <b>10</b>    |
| <b>4. Quantitative data of cell cycle analysis: Figure S3</b>                 | <b>14</b>    |
| <b>5. Analytical data for 41, 42, and 43 and their derivatives: Figure S4</b> | <b>16-46</b> |

## 1. Experimental Section

All chemicals for synthesis were purchased from Sigma-Aldrich Chemical Co., Fisher Scientific (Pittsburgh, PA), Matrix Scientific (Columbia, SC), AK Scientific (Mountain View, CA), Oakwood Products (West Columbia, SC) etc. and used without further purification. Moisture-sensitive reactions were carried under an argon or nitrogen atmosphere. Analytical thin-layer chromatography (TLC) was carried out on pre-coated silica gel (Merck Kieselgel 60 F<sub>254</sub> layer thickness 0.25 mm). NMR spectra were obtained on a Bruker Avance III 400 (Billerica, MA) spectrometer. Chemical shifts are reported as parts per million (ppm) relative to TMS in CDCl<sub>3</sub>. The structure of synthesized compounds was also assigned by <sup>1</sup>H-<sup>1</sup>H 2D-COSY NMR analytic method. Flash column chromatography was performed on using silicagel (230-400 mesh, Merck). Mass spectral data was collected on a Bruker Esquire-LC/MS system (Bruker Daltonics, Billerica, MA) equipped with electrospray/ion trap instrument in positive and negative ion modes (ESI source). The purity of the final compounds was analyzed by an Agilent 1100 HPLC system (Santa Clara, CA). HPLC conditions: 45% acetonitrile at flow rate of 1.0 mL/min using a Phenomenex LUNA 5 μ C18 100A column (250 × 4.60 mm) purchased from Phenomenex (Torrance, CA) at ambient temperature. UV detection was set at 340 nm or 245 nm. Purities of the compounds were established by careful integration of areas for all peaks detected and determined as ≥95% for all compounds tested biological study. Log P & molecular weight were calculated by ChemBioOffice registered in UTHSC. M14/LCC6MDR1 melanoma cell line was shared with Dr. Robert Clarke's lab at the Georgetown University, and Taxol resistant prostate cancer cell line PC-3/TxR and DU145/TxR with Dr. Evan T. Keller's lab at the University of Michigan.

**General synthetic procedures. Method A** for protected indolyl bromides of **27 ~ 32**: A mixture of 2-bromopyridine-3,4-diamine (**26**, 1.0 mmol), protected-indolyl-carbaldehydes (**20~25**, 1.1 mmol), and TsOH (0.10 mmol) in 1,4-dioxane (10 mL) or, alternatively, c-H<sub>2</sub>SO<sub>4</sub> as a catalytic amount in toluene/DMF (10/1, v/v) in a Dean-Stark apparatus. The solution was heated to reflux overnight. The mixture was concentrated under reduced pressure and poured into EtOAc, which was washed with water and dried over anhydrous MgSO<sub>4</sub>, concentrated, purified by silica gel chromatography (EtOAc/*n*-hexane) and recrystallized under EtOAc/hexane to give the desired products. **Method B** for protected indolyl imidazopyridines **33 ~ 38**: A mixture of compounds **27 ~ 32** (0.15 mmol), tetrakis(triphenylphosphine) palladium (0) (4.5 μmol), and **8** [(3,4,5-trimethoxyphenyl)boronic acid (0.15 mmol)] in THF/MeOH (1/1 mL) with sodium carbonate (0.3 mmol, 2 *N* in deoxygenated water) were loaded into a vessel with a cap. Reaction vessels were placed in a reactor block in the microwave. A programmable microwave irradiation cycle of 30 min at 300 W and 25 min of fan-cooling was executed (irradiation time, 30 min). The mixture was transferred to a round bottom flask to be concentrated under reduced pressure and poured into EtOAc, which was washed with water and dried over anhydrous MgSO<sub>4</sub>, concentrated, purified by silica gel chromatography (EtOAc/*n*-hexane) to afford the desired products. **Method C** for compounds **39 ~ 44**: To a solution of protected indoles (**33 ~ 38**) (0.56 mmol) in 10 mL ethanol was added a 10% solution of NaOH (5.68 mmol), and the mixture was refluxed for 20 h. Then, ethanol was evaporated, brine and CH<sub>2</sub>Cl<sub>2</sub> were added, and the organic phase extracted with CH<sub>2</sub>Cl<sub>2</sub> and then purified by flash column chromatography on silica gel using EtOAc/hexane or CH<sub>2</sub>Cl<sub>2</sub>/hexane as an eluent to give the target compounds.

**4-Bromo-2-(1-(phenylsulfonyl)-1*H*-indol-2-yl)-1*H*-imidazo[4,5-*c*]pyridine (27).**

Method A; Yield 32%; Yellow solid; MS (ESI): 450.8 [M – H]<sup>-</sup>; LCMS (ESI) *m/z* calcd for C<sub>20</sub>H<sub>13</sub>BrN<sub>4</sub>O<sub>2</sub>S: 453.0021. Found: 453.0022 [M + H]<sup>+</sup>; <sup>1</sup>H NMR (acetone-*d*<sub>6</sub>, 400 MHz) δ 12.73 (bs, 1H, NH), 8.20 (d, *J* = 5.6 Hz, 1H), 8.20 (d, *J* = 5.6 Hz, 1H), 8.01 (d, *J* = 8.0 Hz, 2H), 7.69 (d, *J* = 5.6 Hz, 1H), 7.66 (m, 2H), 7.55 (t, *J* = 8.0 Hz, 2H), 7.51 (t, *J* = 8.0 Hz, 1H), 7.40 (s, 1H), 7.36 (t, *J* = 7.4 Hz, 1H).

**4-Bromo-2-(1-(phenylsulfonyl)-1*H*-indol-3-yl)-1*H*-imidazo[4,5-*c*]pyridine (28).**

Method A; Yield 51%; Light yellow solid; MS (ESI): 450.9 [M – H]<sup>-</sup>; LCMS (ESI) *m/z* calcd for C<sub>20</sub>H<sub>13</sub>BrN<sub>4</sub>O<sub>2</sub>S: 453.0021. Found: 453.0026 [M + H]<sup>+</sup>; <sup>1</sup>H NMR (DMSO-*d*<sub>6</sub>, 400 MHz) δ 13.67 (bs, NH), 8.80 (bs, 1H), 8.61 (m, *J* = 7.2 Hz, 1H), 8.14 (d, *J* = 5.6 Hz, 1H) 8.08 (d, *J* = 8.0 Hz, 2H), 8.03 (m, 1H), 7.75 (t, *J* = 7.0 Hz, 1H), 7.65 (d, *J* = 8.0 Hz, 2H), 7.50 -7.49 (m, 2H).

**4-Bromo-2-(1-(phenylsulfonyl)-1*H*-indol-4-yl)-1*H*-imidazo[4,5-*c*]pyridine (29).**

Method A; Yield 50%; Light yellow solid; MS (ESI): 450.8 [M – H]<sup>-</sup>; LCMS (ESI) *m/z* calcd for C<sub>20</sub>H<sub>13</sub>BrN<sub>4</sub>O<sub>2</sub>S: 453.0021. Found: 453.0023 [M + H]<sup>+</sup>; <sup>1</sup>H NMR (acetone-*d*<sub>6</sub>, 400 MHz) δ 12.67 (bs, 1H), 8.23 (d, *J* = 8.4 Hz, 1H), 8.12 (d, *J* = 5.6 Hz, 1H), 8.07-8.04 (m, 2H), 8.04-8.01 (m, 2H), 7.97 (d, *J* = 3.6 Hz, 1H), 7.71 (m, 1H), 7.61-7.55 (m, 4H), 7.53 (t, *J* = 8.0 Hz, 1H).

**4-Bromo-2-(1-(phenylsulfonyl)-1*H*-indol-5-yl)-1*H*-imidazo[4,5-*c*]pyridine (30).**

Method A; Yield 51%; Light brown solid; MS (ESI): 450.8 [M – H]<sup>-</sup>; LCMS (ESI) *m/z* calcd for C<sub>20</sub>H<sub>13</sub>BrN<sub>4</sub>O<sub>2</sub>S: 453.0021. Found: 453.0021 [M + H]<sup>+</sup>; <sup>1</sup>H NMR (acetone-*d*<sub>6</sub>, 400 MHz) δ 12.69 (bs, 1H), 8.51 (s, 1H), 8.27 (dd, *J* = 1.6, 8.8 Hz, 1H), 8.21 (d, *J* = 8.8 Hz, 1H), 8.11-8.06 (m, 3H), 7.85 (d, *J* = 3.4 Hz, 1H), 7.70 (m, 1H), 7.61 (m, 2H), 7.56 (d, *J* = 5.2 Hz, 1H), 6.96 (d, *J* = 3.4 Hz, 1H).

**4-Bromo-2-(1-(phenylsulfonyl)-1*H*-indol-6-yl)-1*H*-imidazo[4,5-*c*]pyridine (31).**

Method A; Yield 50%; Light yellow solid; MS (ESI): 450.8 [M – H]<sup>-</sup>, LCMS (ESI) *m/z* calcd for C<sub>20</sub>H<sub>13</sub>BrN<sub>4</sub>O<sub>2</sub>S: 453.0021. Found: 453.0023 [M + H]<sup>+</sup>; <sup>1</sup>H NMR (acetone-*d*<sub>6</sub>, 400 MHz) δ 8.90 (s, 1H), 8.25 (dd, *J* = 8.4, 0.8 Hz, 1H), 8.13 (d, *J* = 5.2 Hz, 1H), 8.06 (d, *J* = 7.6 Hz, 2H), 7.88 (d, *J* = 3.6 Hz, 1H), 7.78 (d, *J* = 8.4 Hz, 1H), 7.64 (t, *J* = 7.4 Hz, 1H), 7.61-7.56 (m, 3H), 6.92 (d, *J* = 3.6 Hz, 1H).

**4-Bromo-2-(1-(phenylsulfonyl)-1*H*-indol-7-yl)-1*H*-imidazo[4,5-*c*]pyridine (32).**

Method A; Yield 56%; Light yellow solid; MS (ESI): 450.8 [M – H]<sup>-</sup>; LCMS (ESI) *m/z* calcd for C<sub>20</sub>H<sub>13</sub>BrN<sub>4</sub>O<sub>2</sub>S: 453.0021. Found: 453.0019 [M + H]<sup>+</sup>; <sup>1</sup>H NMR (CDCl<sub>3</sub>, 400 MHz) δ 12.45 (bs, NH, 1H), 7.96 (d, *J* = 5.2 Hz, 1H), 7.59 (d, *J* = 5.2 Hz, 1H), 7.52 (d, *J* = 7.6 Hz, 2H), 7.48 (d, *J* = 7.2 Hz, 1H), 7.44 (d, *J* = 3.6 Hz, 1H), 7.41 (m, 1H), 7.28-7.20 (m, 4H), 6.67 (d, *J* = 3.6 Hz, 1H).

**2-(1-(Phenylsulfonyl)-1*H*-indol-2-yl)-4-(3,4,5-trimethoxyphenyl)-1*H*-imidazo[4,5-*c*]pyridine (33).**

Method B; Yield 60%; Yellow solid; MS (ESI): 398.1 [M - (PhSO<sub>2</sub>)]<sup>-</sup>; 538.8 [M - H]<sup>-</sup>; LCMS (ESI) *m/z* calcd for C<sub>29</sub>H<sub>24</sub>N<sub>4</sub>O<sub>5</sub>S: 541.1546. Found: 541.1547 [M + H]<sup>+</sup>; <sup>1</sup>H NMR (acetone-*d*<sub>6</sub>, 400 MHz) δ 8.50 (d, *J* = 5.6 Hz, 1H), 8.42 (bs, 1H), 8.22 (d, *J* = 8.4 Hz, 1H), 7.88 (d, *J* = 7.6 Hz, 2H), 7.71-7.60 (m, 3H), 7.56-7.42 (m, 3H), 7.42 (s, 1H), 7.36 (t, *J* = 7.6 Hz, 1H), 3.94 (s, 6H), 3.84 (s, 3H).

**2-(1-(Phenylsulfonyl)-1*H*-indol-3-yl)-4-(3,4,5-trimethoxyphenyl)-1*H*-imidazo[4,5-*c*]pyridine (34).**

Method B; Yield 65%; Yellow solid; MS (ESI): 398.1 [M - (PhSO<sub>2</sub>)]<sup>-</sup>; 538.8 [M – H]<sup>-</sup>; LCMS (ESI) *m/z* calcd for C<sub>29</sub>H<sub>24</sub>N<sub>4</sub>O<sub>5</sub>S: 541.1546. Found: 541.1555 [M + H]<sup>+</sup>; <sup>1</sup>H NMR (DMSO-*d*<sub>6</sub>, 400 MHz) δ 13.48 (bs, NH), 8.82 (s, 1H), 8.77 (d, *J* = 7.6 Hz, 1H), 8.45 (d, *J* = 5.6 Hz, 1H), 8.39

(s, 2H), 8.09 (d,  $J = 8.0$  Hz, 2H), 8.05 (d,  $J = 8.8$  Hz, 1H), 7.75 (t,  $J = 7.6$  Hz, 1H), 7.66 (t,  $J = 7.6$  Hz, 2H), 7.58 (d,  $J = 5.6$  Hz, 1H), 7.52 (t,  $J = 7.8$  Hz, 1H), 7.45 (t,  $J = 7.4$  Hz, 1H), 4.18 (s, 6H), 3.78 (s, 3H).

**2-(1-(Phenylsulfonyl)-1*H*-indol-4-yl)-4-(3,4,5-trimethoxyphenyl)-1*H*-imidazo[4,5-*c*]pyridine (35).**

Method B; Yield 82%; Yellow solid; MS (ESI): 398.1 [M - (PhSO<sub>2</sub>)]<sup>-</sup>; 538.8 [M - H]<sup>-</sup>; LCMS (ESI)  $m/z$  calcd for C<sub>29</sub>H<sub>24</sub>N<sub>4</sub>O<sub>5</sub>S: 541.1546. Found: 541.1552 [M + H]<sup>+</sup>; <sup>1</sup>H NMR (CDCl<sub>3</sub>, 400 MHz) δ 8.43 (d,  $J = 4.0$  Hz, 1H), 8.14 (d,  $J = 8.0$  Hz, 2H), (bs, NH), 8.82 (s, 1H), 8.77 (d,  $J = 7.6$  Hz, 1H), 8.45 (d,  $J = 5.6$  Hz, 1H), 8.39 (s, 2H), 8.09 (d,  $J = 8.0$  Hz, 2H), 8.05 (d,  $J = 8.8$  Hz, 1H), 7.75 (t,  $J = 7.6$  Hz, 1H), 7.66 (t,  $J = 7.6$  Hz, 2H), 7.58 (d,  $J = 5.6$  Hz, 1H), 7.52 (t,  $J = 7.8$  Hz, 1H), 7.45 (t,  $J = 7.4$  Hz, 1H), 4.18 (s, 6H), 3.78 (s, 3H).

**2-(1-(Phenylsulfonyl)-1*H*-indol-5-yl)-4-(3,4,5-trimethoxyphenyl)-1*H*-imidazo[4,5-*c*]pyridine (36).**

Method B; Yield; 57%; Pistachio green solid; MS (ESI): 398.1 [M - (PhSO<sub>2</sub>)]<sup>-</sup>; 538.8 [M - H]<sup>-</sup>; LCMS (ESI)  $m/z$  calcd for C<sub>29</sub>H<sub>24</sub>N<sub>4</sub>O<sub>5</sub>S: 541.1546. Found: 541.1545 [M + H]<sup>+</sup>; <sup>1</sup>H NMR (DMSO-*d*<sub>6</sub>, 400 MHz) δ 8.37 (d,  $J = 5.2$  Hz, 1H), 8.27 (s, 1H), 8.11-8.06 (m, 2H), 7.94 (bs, 2H), 7.88 (d,  $J = 8.0$  Hz, 2H), 7.60 (d,  $J = 3.0$  Hz, 1H), 7.55 (t,  $J = 7.4$  Hz, 1H), 7.45 (t,  $J = 7.4$  Hz, 2H), 7.33 (bs, 1H), 6.66 (d,  $J = 3.0$  Hz, 1H), 3.92 (s, 6H), 3.89 (s, 3H).

**2-(1-(Phenylsulfonyl)-1*H*-indol-6-yl)-4-(3,4,5-trimethoxyphenyl)-1*H*-imidazo[4,5-*c*]pyridine (37).**

Method B; Yield; 65%; Yellow solid; MS (ESI): 398.1 [M - (PhSO<sub>2</sub>)]<sup>-</sup>; 538.8 [M - H]<sup>-</sup>; LCMS (ESI)  $m/z$  calcd for C<sub>29</sub>H<sub>24</sub>N<sub>4</sub>O<sub>5</sub>S: 541.1546. Found: 541.1550 [M + H]<sup>+</sup>; <sup>1</sup>H NMR (CDCl<sub>3</sub>, 400 MHz) δ 8.91 (s, 1H), 8.40 (d,  $J = 5.6$  Hz, 1H), 8.22 (bs, 2H), 8.03 (d,  $J = 8.2$  Hz, 1H), 7.82 (d,  $J$

= 7.6 Hz, 2H), 7.61 (d,  $J = 3.6$  Hz, 1H), 7.58 (d,  $J = 8.2$  Hz, 1H), 7.52 (t,  $J = 8.0$  Hz, 1H), 7.35 (t,  $J = 8.0$  Hz, 1H), 7.34 (m, 1H), 6.68 (d,  $J = 3.6$  Hz, 1H), 4.10 (s, 6H), 3.88 (s, 3H).

**2-(1-(Phenylsulfonyl)-1*H*-indol-7-yl)-4-(3,4,5-trimethoxyphenyl)-1*H*-imidazo[4,5-*c*]pyridine (38).**

Method B; Yield; 56%; Yellow solid; MS (ESI): 398.1 [M - (PhSO<sub>2</sub>)]<sup>-</sup>; 538.8 [M - H]<sup>-</sup>; LCMS (ESI)  $m/z$  calcd for C<sub>29</sub>H<sub>24</sub>N<sub>4</sub>O<sub>5</sub>S: 541.1546. Found: 541.1558 [M + H]<sup>+</sup>; MS (ESI): 538.8 [M - H]<sup>-</sup>; 541.2 [M + H]<sup>+</sup>; 563.2 [M + Na]<sup>+</sup>; <sup>1</sup>H NMR (CDCl<sub>3</sub>, 400 MHz)  $\delta$  8.52 (bs, NH, 1H), 8.10 (bs, 1H), 7.67-7.61 (m, 4H), 7.55 (dt,  $J = 7.6, 1.2$  Hz, 1H), 7.48-7.44 (m, 4H), 7.36 (t,  $J = 7.6$  Hz, 1H), 7.10 (bs, 2H), 6.78 (d,  $J = 3.6$  Hz, 1H), 3.96 (s, 6H), 3.94 (s, 3H).

**2-(1*H*-Indol-2-yl)-4-(3,4,5-trimethoxyphenyl)-1*H*-imidazo[4,5-*c*]pyridine (39).**

Method C; Yield 71%; Yellowish solid; MS (ESI): 399.1 [M - H]<sup>-</sup>; 401.1 [M + H]<sup>+</sup>; LCMS (ESI)  $m/z$  calcd for C<sub>23</sub>H<sub>20</sub>N<sub>4</sub>O<sub>3</sub>: 401.1614. Found: 401.1616 [M + H]<sup>+</sup>; <sup>1</sup>H NMR (CD<sub>3</sub>OD, 400 MHz)  $\delta$  8.32 (d,  $J = 5.6$  Hz, 1H), 7.66 (s, 2H), 7.61 (d,  $J = 8.0$  Hz, 1H), 7.51 (d,  $J = 5.6$  Hz, 1H), 7.43 (d,  $J = 8.4$  Hz, 1H), 7.24 (s, 1H), 7.20 (t,  $J = 7.2$  Hz, 1H), 7.06 (t,  $J = 7.2$  Hz, 1H), 3.96 (s, 6H), 3.85 (s, 3H); HPLC:  $t_R$  21.02 min, purity = 97.50%.

**2-(1*H*-Indol-3-yl)-4-(3,4,5-trimethoxyphenyl)-1*H*-imidazo[4,5-*c*]pyridine (40).**

Method C; Yield 71%; Yellowish solid; MS (ESI): 399.1 [M - H]<sup>-</sup>; 401.3 [M + H]<sup>+</sup>; LCMS (ESI)  $m/z$  calcd for C<sub>23</sub>H<sub>20</sub>N<sub>4</sub>O<sub>3</sub>: 401.1614. Found: 401.1613 [M + H]<sup>+</sup>; <sup>1</sup>H NMR (acetone-*d*<sub>6</sub>, 400 MHz)  $\delta$  12.02 (bs, 1H, NH), 10.90 (bs, 1H, NH), 8.85 (d,  $J = 6.4$  Hz, 1H), 8.61 (s, 2H), 8.34 (d,  $J = 5.2$  Hz, 1H), 8.27 (s, 2H), 7.56 (m, 2H), 7.39 (d,  $J = 5.2$  Hz, 1H), 7.30-7.24 (m, 2H), 4.02 (s, 6H), 3.88 (s, 3H); HPLC:  $t_R$  14.04 min, purity > 99%.

**2-(1*H*-Indol-4-yl)-4-(3,4,5-trimethoxyphenyl)-1*H*-imidazo[4,5-*c*]pyridine (41).**

Method C; Yield 75%; Yellowish solid; MS (ESI): 399.1 [M – H]<sup>-</sup>; 401.3 [M + H]<sup>+</sup>; LCMS (ESI) *m/z* calcd for C<sub>23</sub>H<sub>20</sub>N<sub>4</sub>O<sub>3</sub>: 401.1614. Found: 401.1614 [M + H]<sup>+</sup>; <sup>1</sup>H NMR (acetone-*d*<sub>6</sub>, 400 MHz) δ 11.5 (bs, 1H), 9.8 (bs, 1H), 7.73 (s, 2H), 7.56 (d, *J* = 5.2 Hz, 1H), 7.04 (d, *J* = 7.2 Hz, 1H), 6.94-6.68 (m, 3H), 6.63 (d, *J* = 5.2 Hz, 1H), 6.45 (t, *J* = 8.0 Hz, 1H), 3.18 (s, 6H), 2.99 (s, 3H); HPLC: *t*<sub>R</sub> 12.26 min, purity 99.06%.

**2-(1*H*-Indol-5-yl)-4-(3,4,5-trimethoxyphenyl)-1*H*-imidazo[4,5-*c*]pyridine (42, 5-IIP).**

Method C; Yield 68%; Pistachio green solid; MS (ESI): 399.4 [M – H]<sup>-</sup>; 401.5 [M + H]<sup>+</sup>; LCMS (ESI) *m/z* calcd for C<sub>23</sub>H<sub>20</sub>N<sub>4</sub>O<sub>3</sub>: 401.1614. Found: 401.1613 [M + H]<sup>+</sup>; <sup>1</sup>H NMR (acetone-*d*<sub>6</sub>, 400 MHz) δ 12.5 (bs, 1H), 10.7 (bs, 1H), 8.54 (s, 2H), 8.57 (s, 1H), 8.54 (bs, 2H), 8.37 (d, *J* = 5.2 Hz, 1H), 8.18 (dd, *J* = 8.4, 1.2 Hz, 1H), 7.62 (d, *J* = 8.4 Hz, 1H), 7.46-7.45 (m, 2H), 4.01 (s, 6H), 3.83 (s, 3H); HPLC: *t*<sub>R</sub> 11.75 min, purity = 96.10%.

**2-(1*H*-Indol-6-yl)-4-(3,4,5-trimethoxyphenyl)-1*H*-imidazo[4,5-*c*]pyridine (43, 6-IIP).**

Method C; Yield 71%; Yellowish solid; MS (ESI): 399.1 [M – H]<sup>-</sup>; 401.4 [M + H]<sup>+</sup>; LCMS (ESI) *m/z* calcd for C<sub>23</sub>H<sub>20</sub>N<sub>4</sub>O<sub>3</sub>: 401.1614. Found: 401.1614 [M + H]<sup>+</sup>; <sup>1</sup>H NMR (acetone-*d*<sub>6</sub>, 400 MHz) δ 12.4 (bs, 1H), 10.7 (bs, 1H), 8.54 (s, 2H), 8.50 (s, 1H), 8.37 (d, *J* = 5.2 Hz, 1H), 8.01 (d, *J* = 8.4 Hz, 1H), 7.76 (d, *J* = 8.4 Hz, 1H), 7.52 (s, 1H), 7.45 (d, *J* = 5.2 Hz, 1H), 6.59 (s, 1H), 4.00 (s, 6H), 3.83 (s, 3H); HPLC: *t*<sub>R</sub> 12.26 min, purity = 97.44%.

**2-(1*H*-Indol-7-yl)-4-(3,4,5-trimethoxyphenyl)-1*H*-imidazo[4,5-*c*]pyridine (44, 7-IIP).**

Method C; Yield 58%; Light yellowish solid; MS (ESI): 399.1 [M – H]<sup>-</sup>; 401.3 [M + H]<sup>+</sup>; LCMS (ESI) *m/z* calcd for C<sub>23</sub>H<sub>20</sub>N<sub>4</sub>O<sub>3</sub>: 401.1614. Found: 401.1616 [M + H]<sup>+</sup>; <sup>1</sup>H NMR (CDCl<sub>3</sub>, 400 MHz) δ 11.1 (bs, 1H), 8.45 (d, *J* = 5.2 Hz, 1H), 7.94 (s, 2H), 7.81 (d, *J* = 7.6 Hz, 1H), 7.77 (d, *J* = 7.6 Hz, 1H), 7.35 (m, 1H), 7.18 (t, *J* = 7.6 Hz, 1H), 6.66 (t, *J* = 2.6 Hz, 1H), 3.97 (s, 6H), 3.96 (s, 3H); HPLC: *t*<sub>R</sub> 13.78 min, purity > 99%.



**2-(1*H*-Indol-7-yl)-4-(3,4,5-trimethoxyphenyl)-2,3-dihydro-1*H*-imidazo[4,5-*c*]pyridine (44a).**

Yellow solid; MS (ESI): 403.3 [M + H]<sup>+</sup>; 401.0 [M - H]<sup>-</sup>; LCMS (ESI) *m/z* calcd for C<sub>23</sub>H<sub>22</sub>N<sub>4</sub>O<sub>3</sub>: 403.1770. Found: 403.1772 [M + H]<sup>+</sup>; <sup>1</sup>H NMR (CDCl<sub>3</sub>, 400 MHz) δ 10.73 (bs, 1H, NH), 8.35 (s, 1H), 8.20 (d, *J* = 5.6 Hz, 1H), 7.82 (d, *J* = 7.6 Hz, 1H), 7.36 (dd, *J* = 3.2, 2.4 Hz, 1H), 7.36 (dd, *J* = 7.2, 1.2 Hz, 1H), 7.14 (t, *J* = 7.2 Hz, 1H), 6.89 (s, 2H), 6.68 (d, *J* = 5.6 Hz, 1H), 6.65 (dd, *J* = 3.2, 2.4 Hz, 1H), 4.53 (bs, 2H, NH), 3.87 (s, 3H), 3.54 (s, 6H); HPLC: *t*<sub>R</sub> 16.57 min, purity > 99%.

**2. Figure S1. Structures of known colchicine inhibitors**

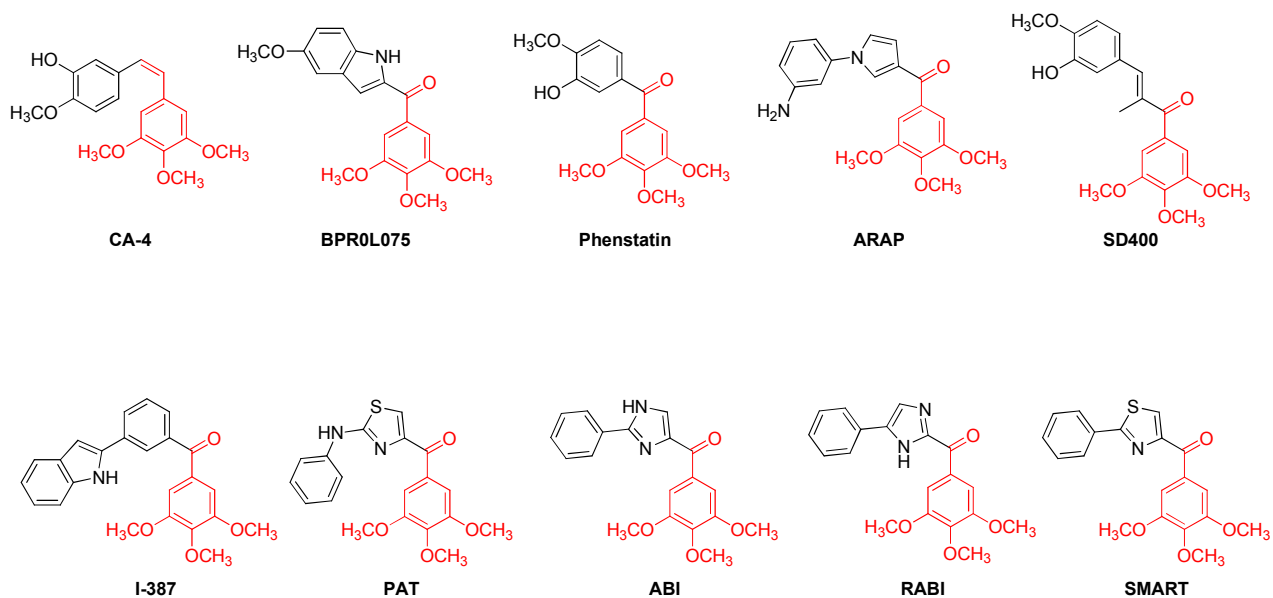

### 3. Molecular Modeling

Docking study was performed in Schrodinger Molecular Modeling Suite 2014 (Schrodinger Inc., Portland, OR) following a similar procedure as described before<sup>17b</sup> using the DAMA colchicine-tubulin complex (Protein Data Bank code: 1SA0) as the template. All the compounds including native ligand were first prepared by LigPrep panel in Schrodinger software to generate at most 32 favored conformations for each compound under physiological pH and temperature. Tubulin receptor grid was generated by taking off the native ligand but reserving the center binding site residue orientations. Then both the tubulin inhibitors investigated in this study and native ligand DAMA colchicine were docked into the same colchicine binding pocket and the output poses were minimized through molecular dynamics calculation.

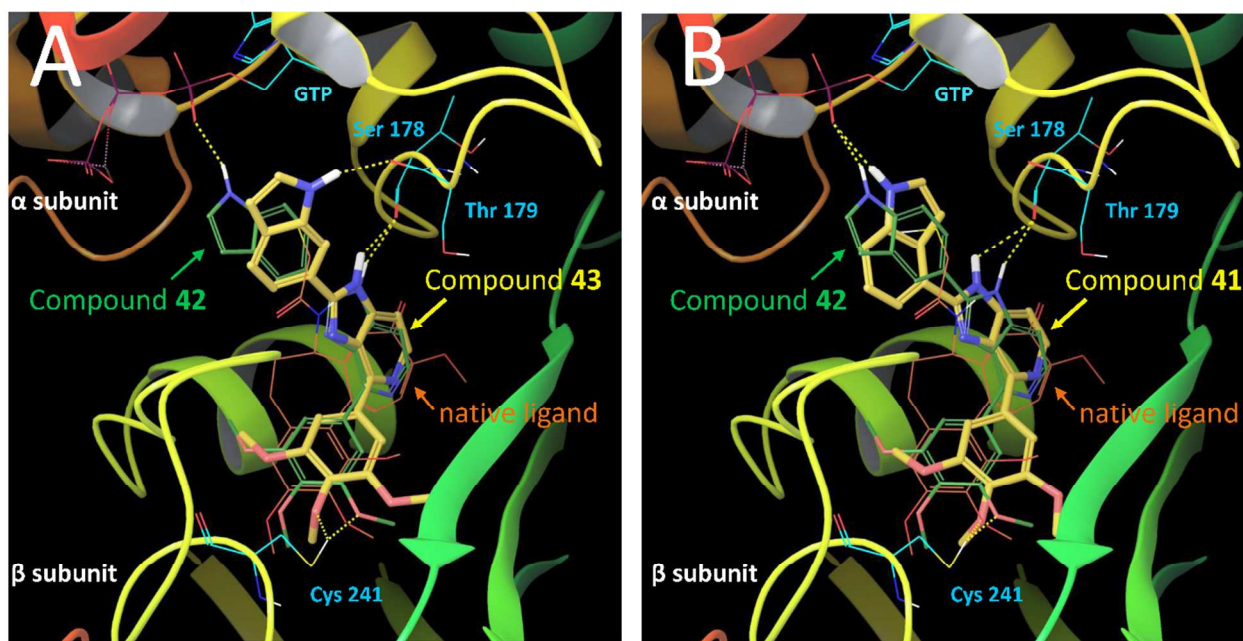

**Figure S2.** Proposed binding poses for 6-indolyl compound **43** (yellow thick tube in panel A) and 4-indolyl compound **41** (yellow thick tube in panel B) in colchicine binding site of  $\alpha,\beta$ -tubulin (PDB code:1SA0), compared with 5-indolyl compound **42** (green thin tube in panels A and B) and native ligand DAMA-colchicine (orange wire in panels A and B).

We docked **41** and **43** into the colchicine binding site of the DAMA-colchicine- $\alpha,\beta$ -tubulin complex (Figure 3, PDB code:1SA0) and they generally showed similar binding poses as shown with **42** in our previous study.<sup>17b</sup> The C-ring TMP moiety of all three compounds inserted deeply into the  $\beta$ -subunit and formed hydrogen bonds with residue Cys-241, in a manner similar to the native ligand DAMA-colchicine (Figure 3, panel A and B). The imidazole B-ring moieties of all three compounds overlapped very well and were anchored by hydrogen bonds between imidazole NH groups and  $\alpha$ -subunit residue Thr-179. Meanwhile, the A-ring indolyl moiety of all three compounds extended toward the interface between  $\alpha$ - and  $\beta$ -subunit. Interestingly, the orientation of A-ring indole moieties varied with the point of attachment of the indole to the imidazole. Unlike the 5-indolyl **42**, in which the indolyl NH group is pointing towards the GTP in  $\alpha$ -subunit, **43** (6-indolyl) had its indole moiety oriented in the opposite direction and connected with  $\alpha$ -subunit residue Ser-178 through a hydrogen bond (Figure 3, panel A). **41** (4-indolyl) slightly glided out of the  $\beta$ -subunit pocket and its orientation favored a hydrogen bond between the indolyl NH group and the GTP in  $\alpha$ -subunit (Figure 3, panel B). In our modeling approach, the docking scores of **41**, **42**, and **43** (-8.18, -8.84 and -8.61, respectively) were comparable to that of native ligand (-9.12), indicating good binding affinity of these analogs with tubulin dimer.

## **4. Biological Studies**

### **4.1 Cell Culture and Viability Assay of Human Melanoma and Prostate Cancer Cells**

All cell lines were purchased from ATCC (American Type Culture Collection, Manassas, VA, USA). Human melanoma cells A375, WM164, M14 and M14/LCC6MDR1 were cultured in DMEM medium (Mediatech, Inc., Manassas, VA) supplemented with 10% fetal bovine serum (Atlanta Biologicals, Lawrenceville, GA) and 1% antibiotic-antimycotic mixture (Sigma-Aldrich, St. Louis, MO). Human prostate cancer cells PC-3, DU145 and PPC-1 were cultured in RPMI-1640 medium (Mediatech, Inc., Manassas, VA) supplemented with 10% fetal bovine serum (Atlanta Biologicals, Lawrenceville, GA) and 1% antibiotic-antimycotic mixture (Sigma-Aldrich, St. Louis, MO). The antiproliferation activities of all the compounds were tested with a MTS cell viability assay after 48 h incubation following the same procedure described before.

### **4.2 *In Vitro* Tubulin Polymerization Assay**

HTS-tubulin polymerization assay kit (Cytoskeleton, Denver, CO) was used to determine the changes of tubulin polymerization profile in the presence of our compounds. Briefly, porcine brain tubulin (0.4 mg, >97% pure) was reconstituted in ice-cold 100  $\mu$ L of general tubulin buffer containing 5  $\mu$ M or 10  $\mu$ M of the test compounds and incubated at 37 °C for tubulin polymerization (n = 3). Reaction system with same final concentration of DMSO (1%) was used as assay control. The absorbance of wavelength at 340 nm was kinetically read every 1 min for 60 min by a SYNERGY 4 microplate reader (Bio-Tek Instruments, Winooski, VT).

### **4.3 Cell Cycle Analysis**

Human melanoma A375 cells or human prostate cancer PC-3 cells were cultured in 10 cm tissue culture dishes (n = 3) until the confluence reached 70%. Then the cells were starved to

synchronize in FBS-free medium for 24 h before they were treated by tested compound solution at the concentrations of 10 nM or 50 nM for 24 h in 10% FBS growth medium. Cell pellets were harvested by trypsin and fixed in 70% ethanol overnight at -20 °C. Cellular DNA was stained with 50 µg/mL propidium iodide before they were analyzed in a BD LSR-II cytometer (BD Biosciences, San Jose, CA) with 10,000 cells sorted for each sample. Data were processed using Modfit 2.0 program (Verify Software House, Topsham, ME).

#### **4.4 Liver Microsomal Stability Assay**

The *in vitro* metabolic stability of the selected compounds were studied by incubating the test compounds (2 µM) in a total liver microsomal reaction system (1 mg/mL protein in 0.2 M of phosphate buffer solution (pH 7.4), 1.3 mM NADPH, 3.3 mM glucose-6-phosphate, and 0.4 U/mL glucose-6-phosphate dehydrogenase) at 37 °C in a shaking incubator (n =3). Pooled human liver microsomes (HLM) and pooled male CD1 mouse liver microsomes (MLM) were purchased from Xenotech, LLC (Lenexa, KS). Aliquots (100 µL) were sampled from the reaction mixtures at 0, 5, 10, 20, 30, 60, and 90 min after the beginning of the 37 °C incubation. Each of the aliquots were quenched by adding 300 µL ice-cold acetonitrile. Samples were incubated on ice for 20 min then centrifuged at 10,000 g for 15 min at 4 °C, and the supernatant was analyzed by a LC-MS/MS system (AB Sciex API4500). For metabolite identification, the reaction mixture was incubated for 5 h with test compound at the concentration of 50 µM in the same conditions. The quenched samples were filtered through a 0.2 µm membrane then analyzed with a Water Xevo G2-S high resolution mass spectrometer.

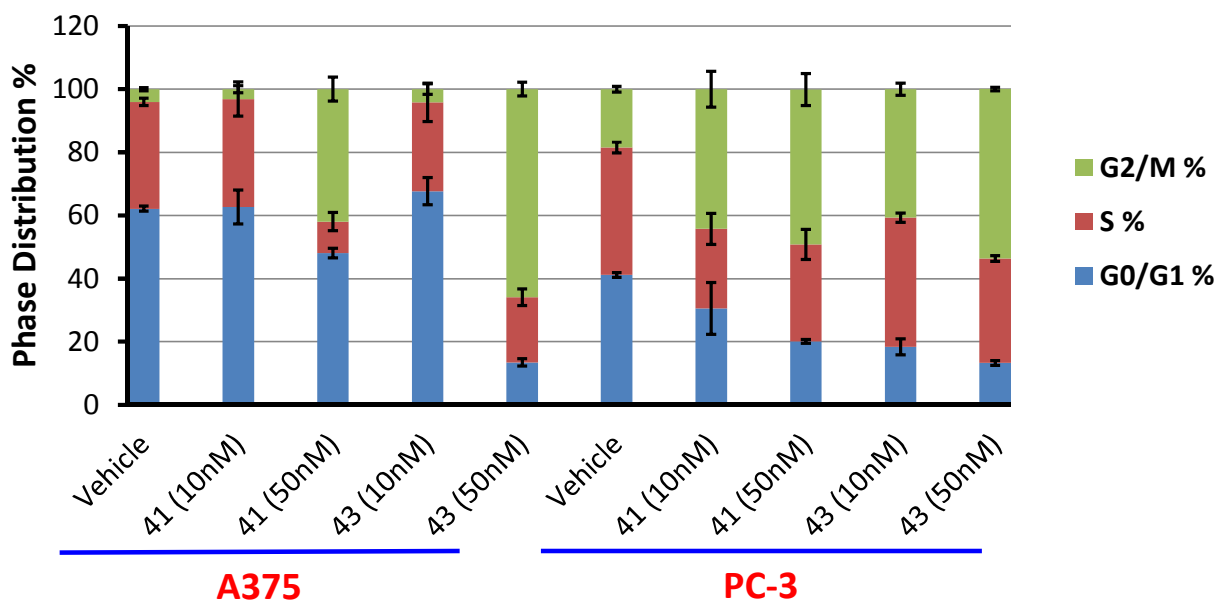

**Figure S3.** Quantitative data of flow cytometry for 6-indolyl compound **43** and 4-indolyl compound **41** showing effectively inhibited the tubulin polymerization *in vitro*.

5. **Figure S4.** Analytical data for compounds 41, 42, and 43 and their derivatives.

Compound **39**, 2-IIP: **HPLC** Analysis  
Column: Phenomenex LUNA 5 $\mu$  C18

250\*4.6 mm  
A: 55% water; B: 45% ACN Flow rate: 1.0 mL/min  
Detection wave length = 340nm

**Purity 97.50%**

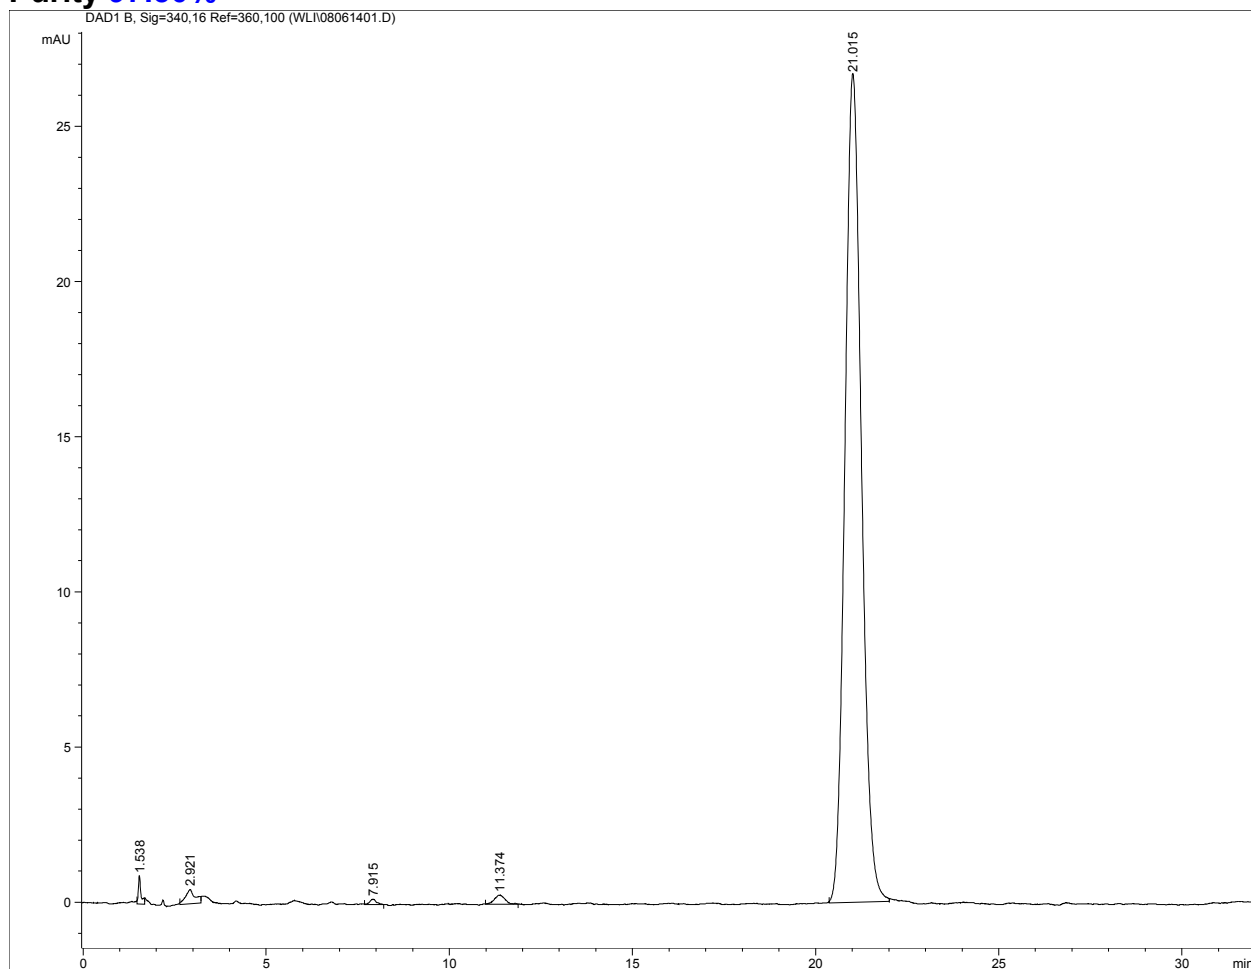

Compound **39**, 2-IIP: HRMS Analysis

DJV39 69 (0.625)

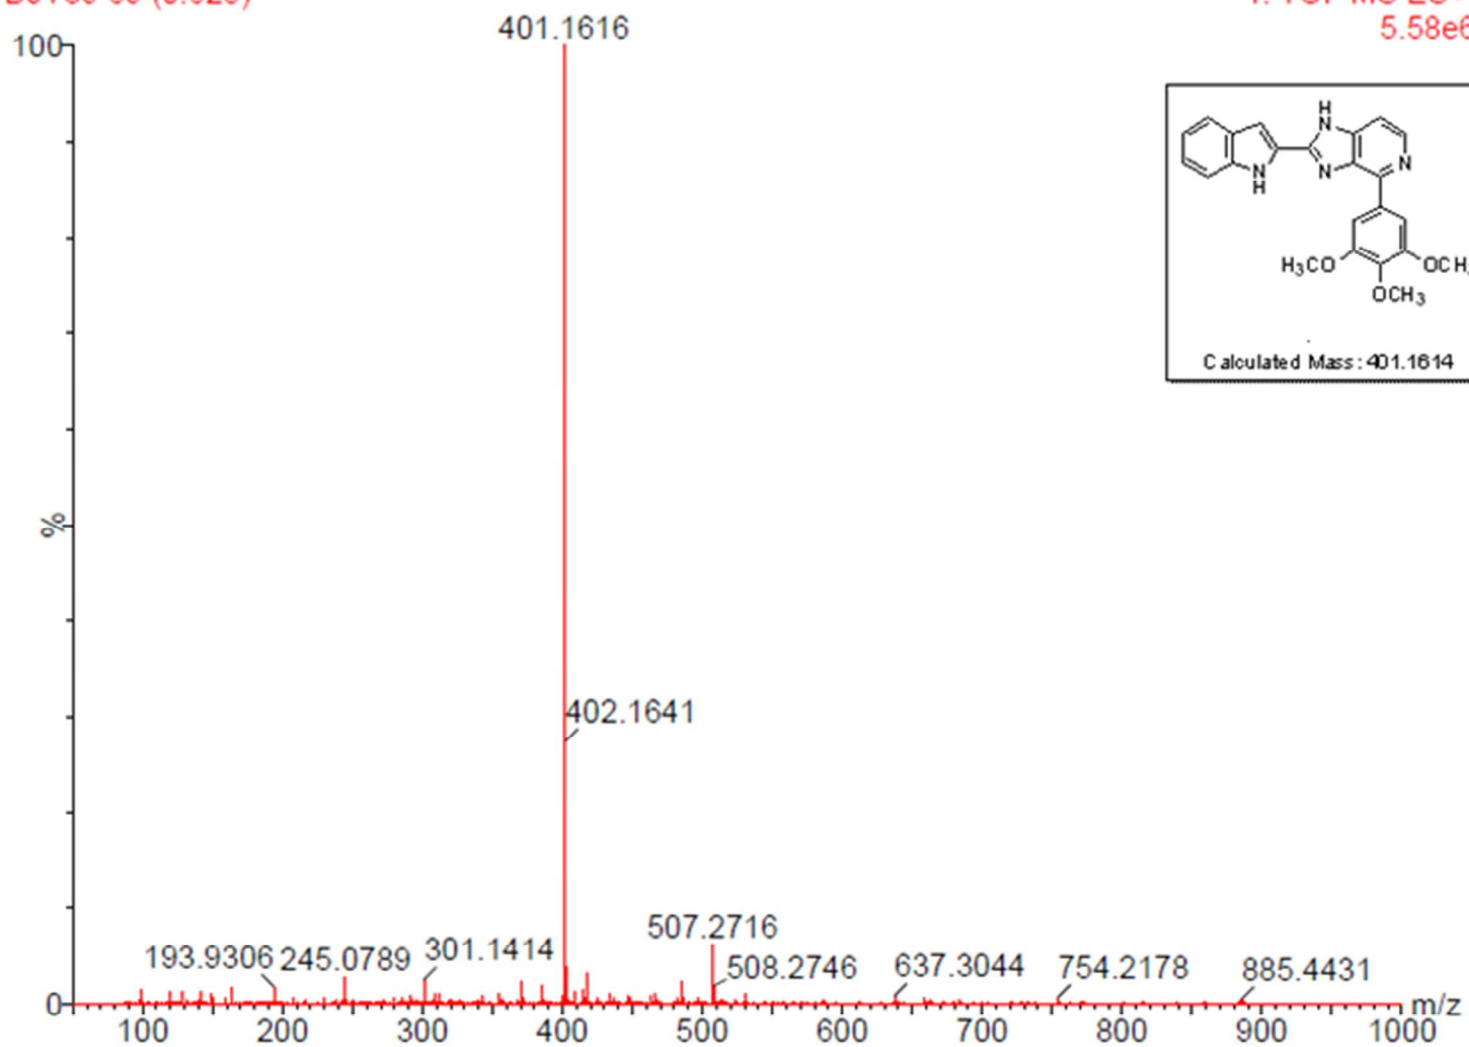



Compound **39**, 2-IIP:  $^1\text{H}$  NMR (MeOD- $d_4$ , 400 MHz)

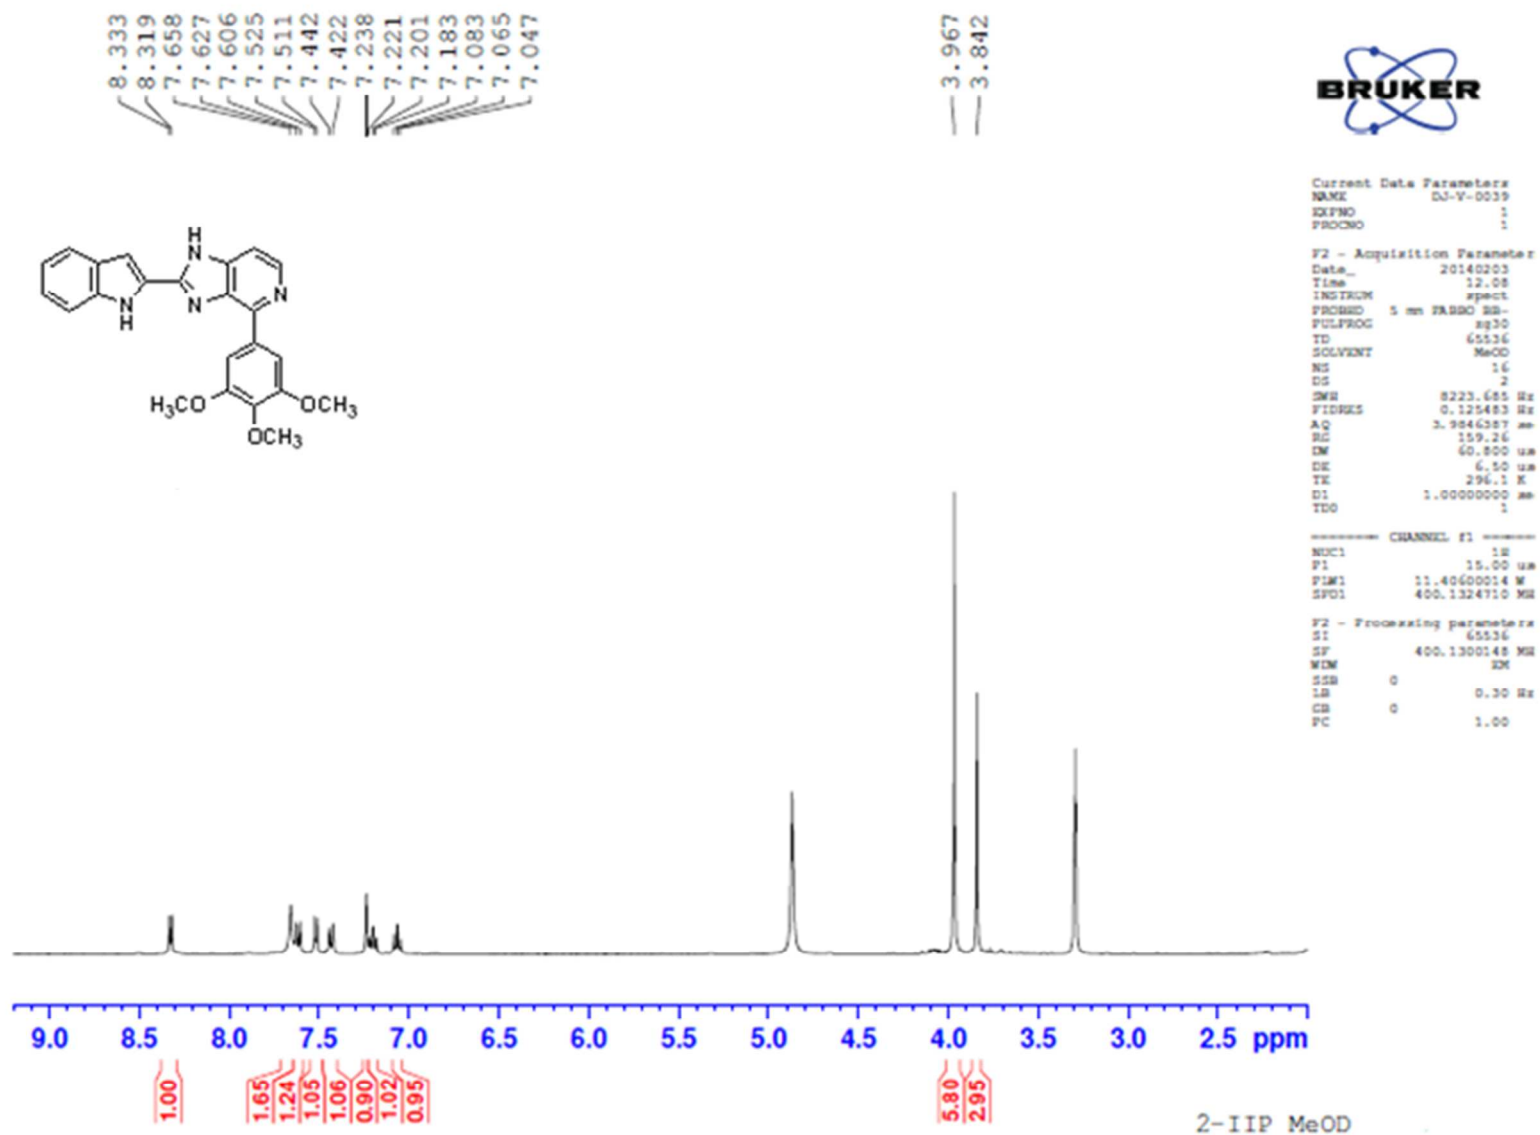

Compound **40**, 3-IIP: **HPLC** Analysis

Column: Phenomenex LUNA 5 $\mu$  C18

250\*4.6 mm

A: 55% water; B: 45% ACN Flow rate: 1.0 mL/min

Detection wave length = 340nm

**Purity > 99.99**

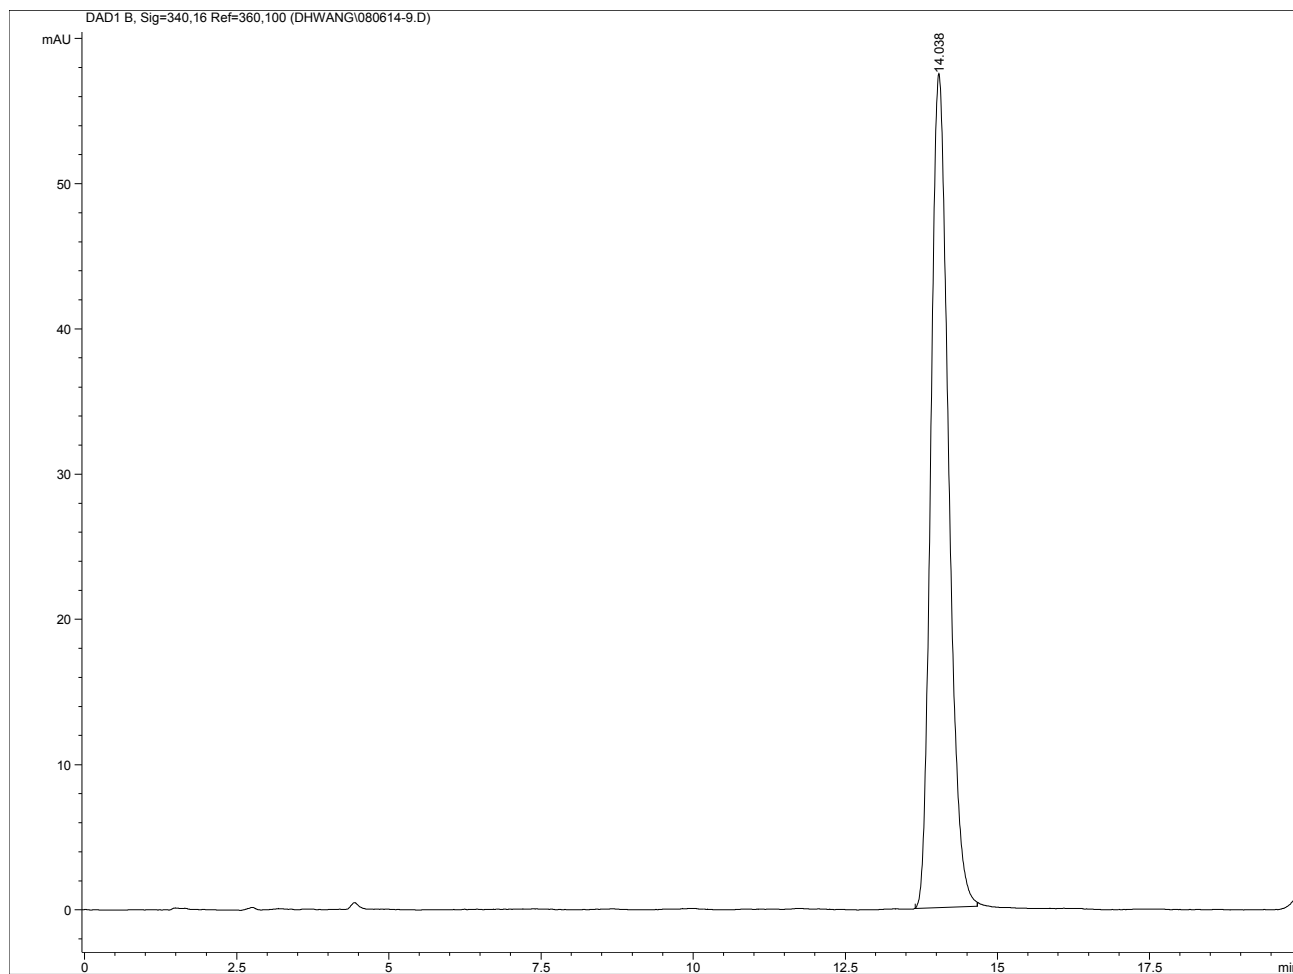

Compound **40**, 3-IIP: HRMS Analysis

DJ-V-63-042814 158 (1.429)

1: TOF MS ES+  
5.89e6

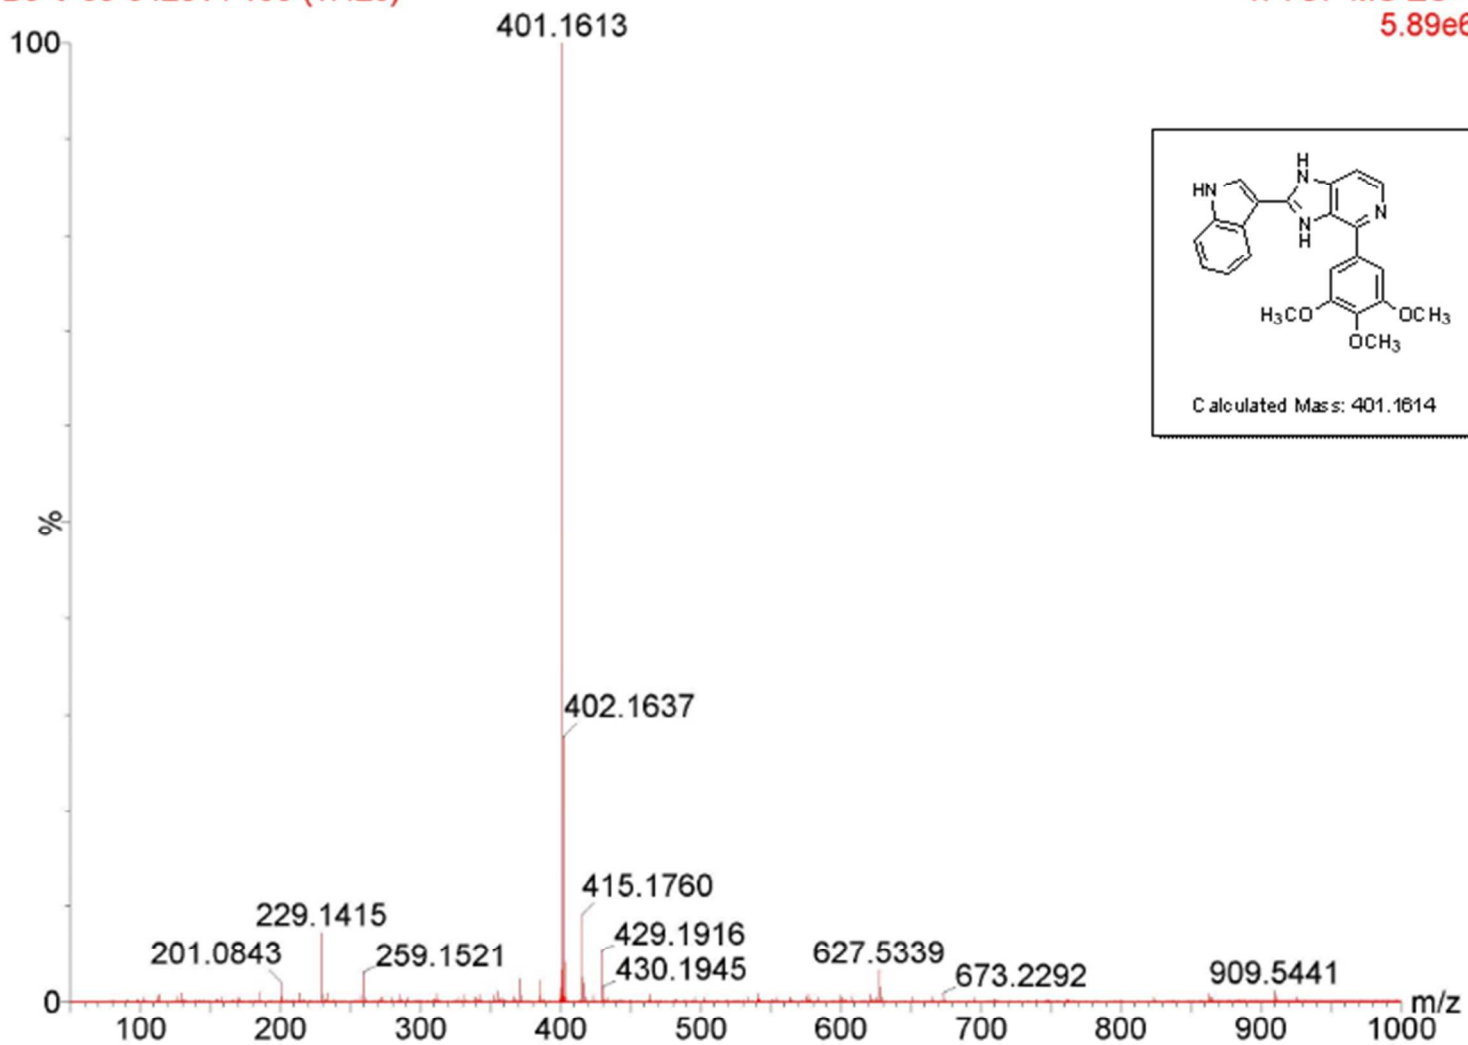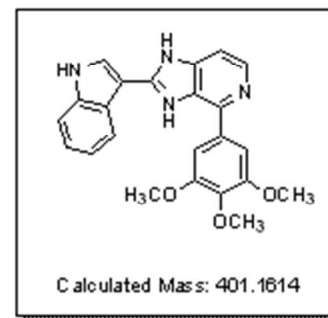

Compound **40**, 3-IIP:  $^1\text{H}$  NMR (MeOD- $d_4$ , 400 MHz)

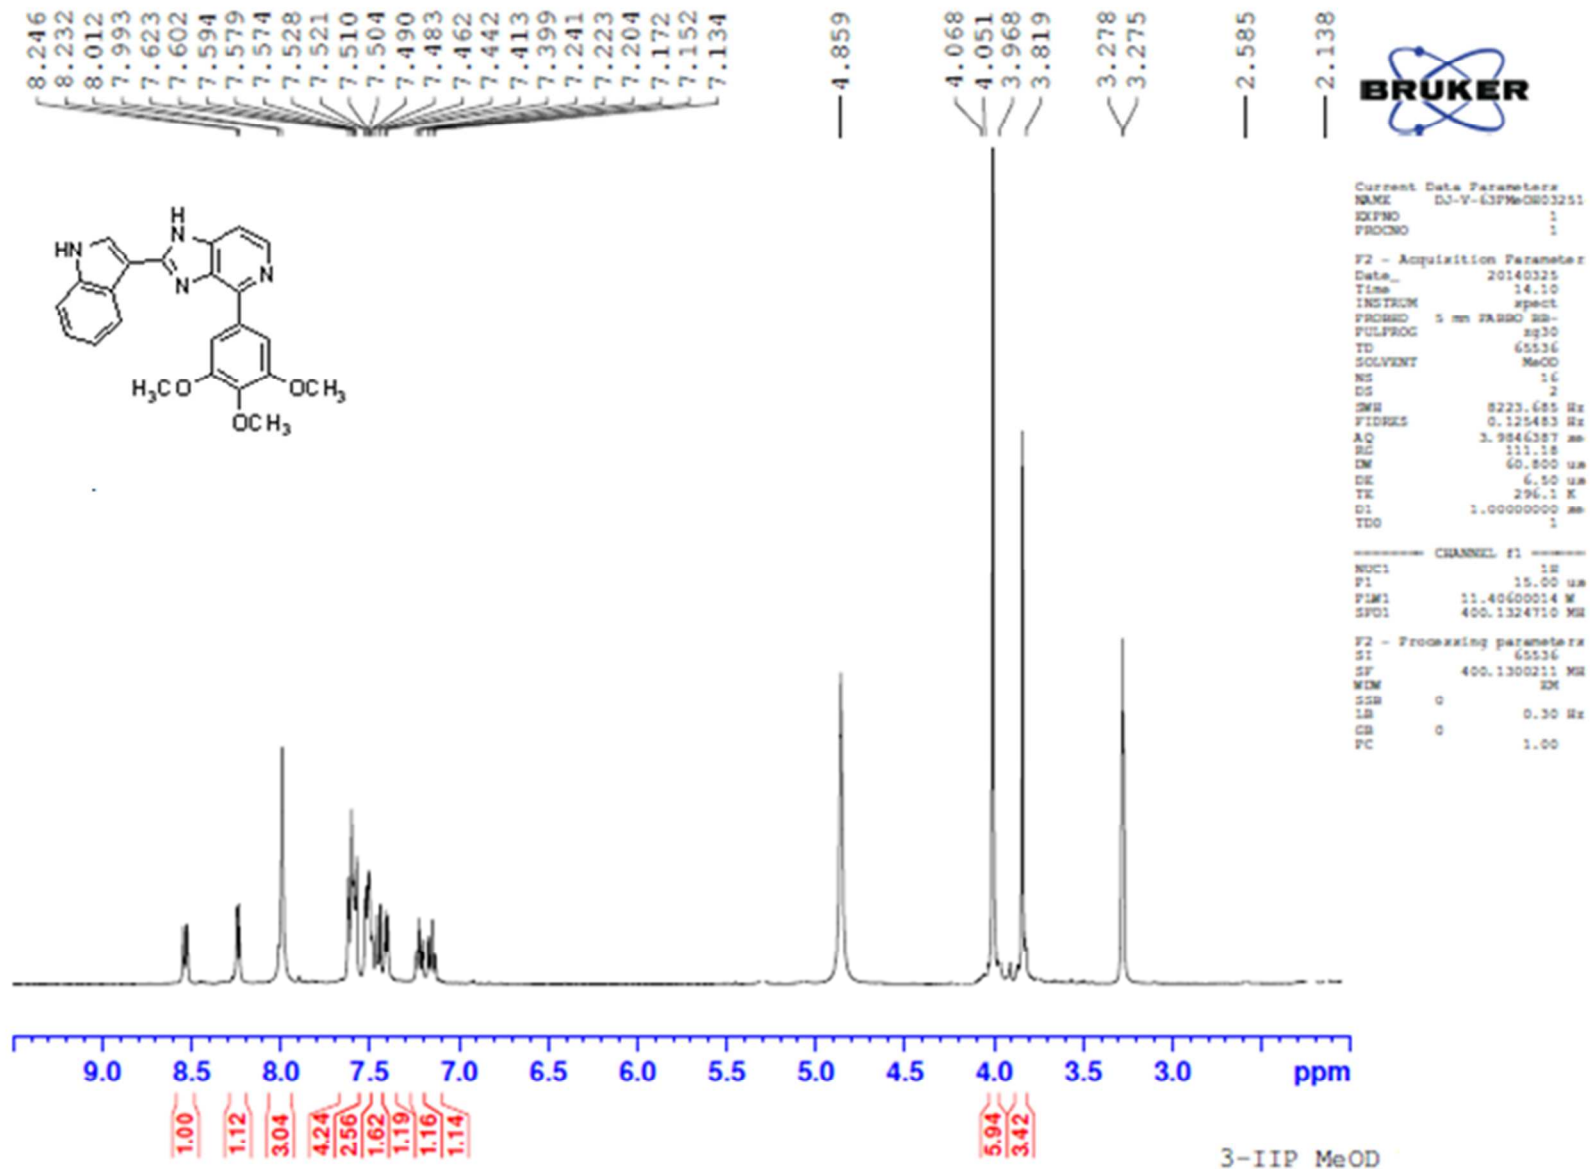

Compound **41**, 4-IIP: **HPLC** Analysis

Column: Phenomenex LUNA 5 $\mu$  C18

250\*4.6 mm

A: 55% water; B: 45% ACN Flow rate: 1.0 mL/min

Detection wave length = 340nm

**Purity 99.06%**

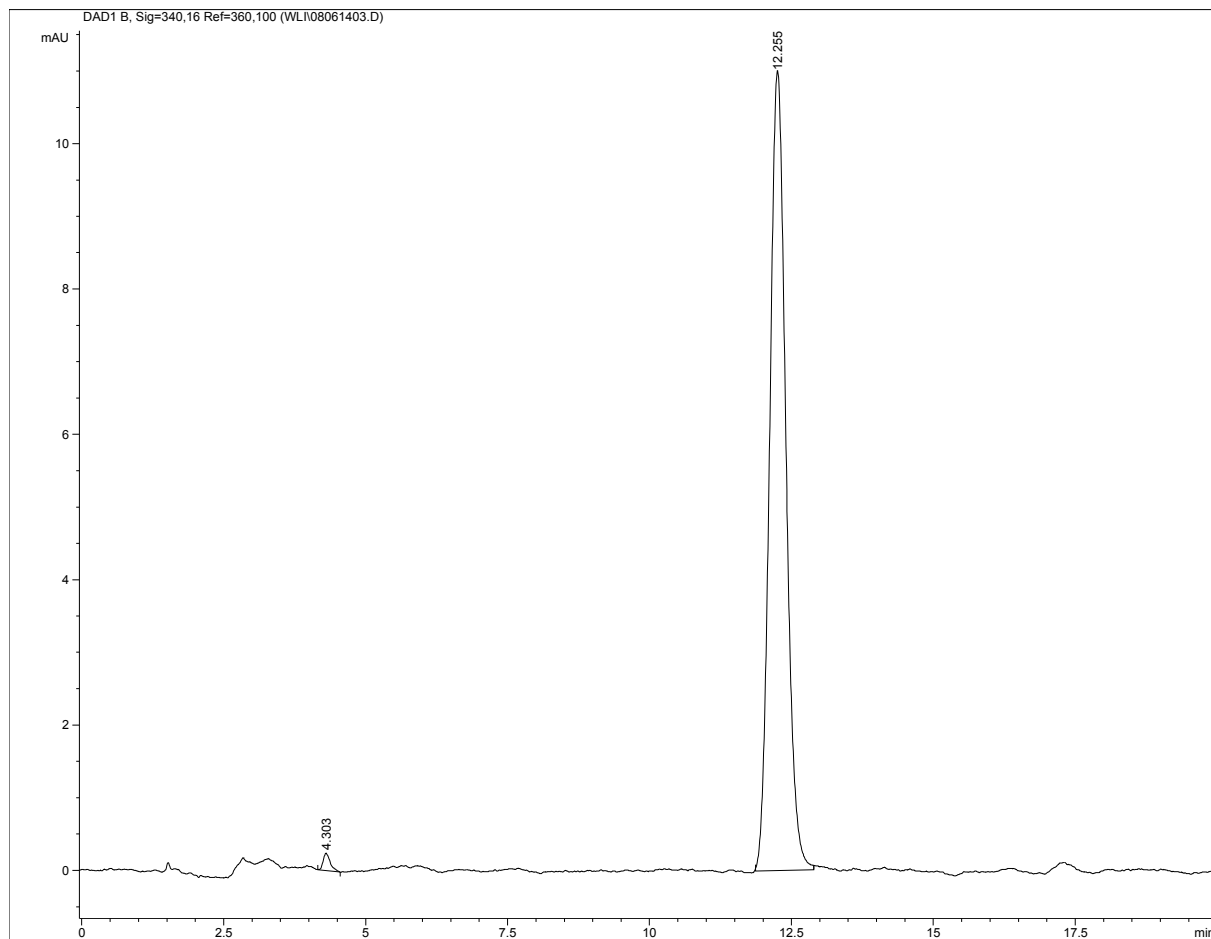

Compound **41**, 4-IIP: **HRMS** Analysis

20140905

DJ-5-101-H0-3 526 (2.167)

1: TOF MS ES+  
2.13e5

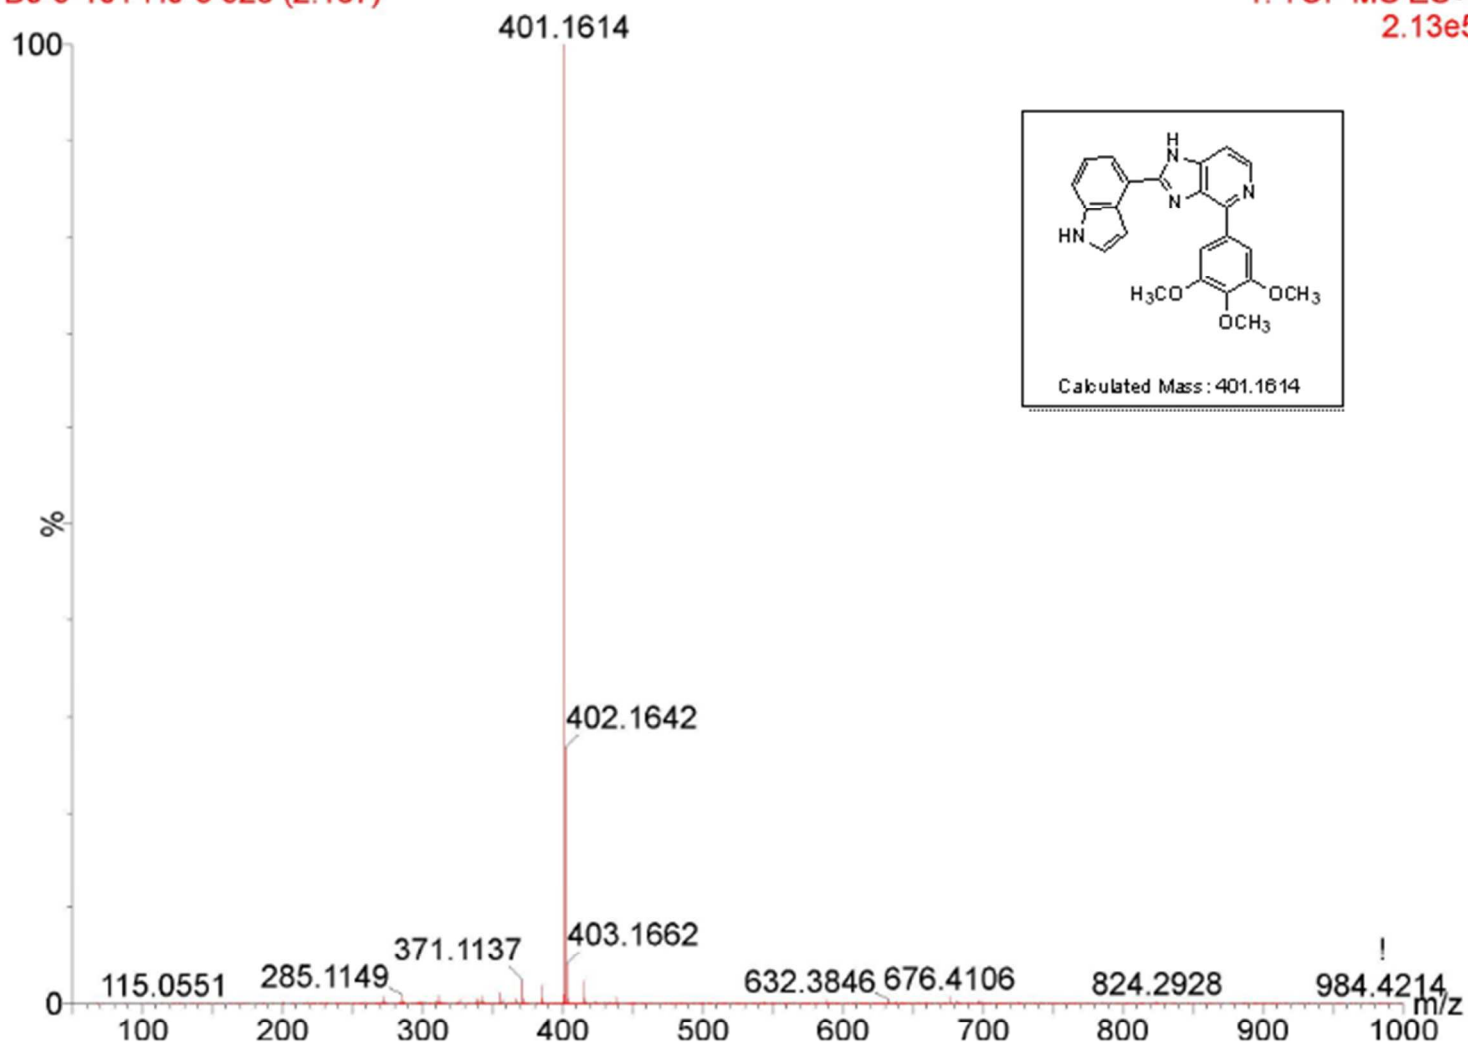

Compound **41**, 4-IIP:  $^1\text{H}$  NMR (Acetone  $d_6$ , 400 MHz)

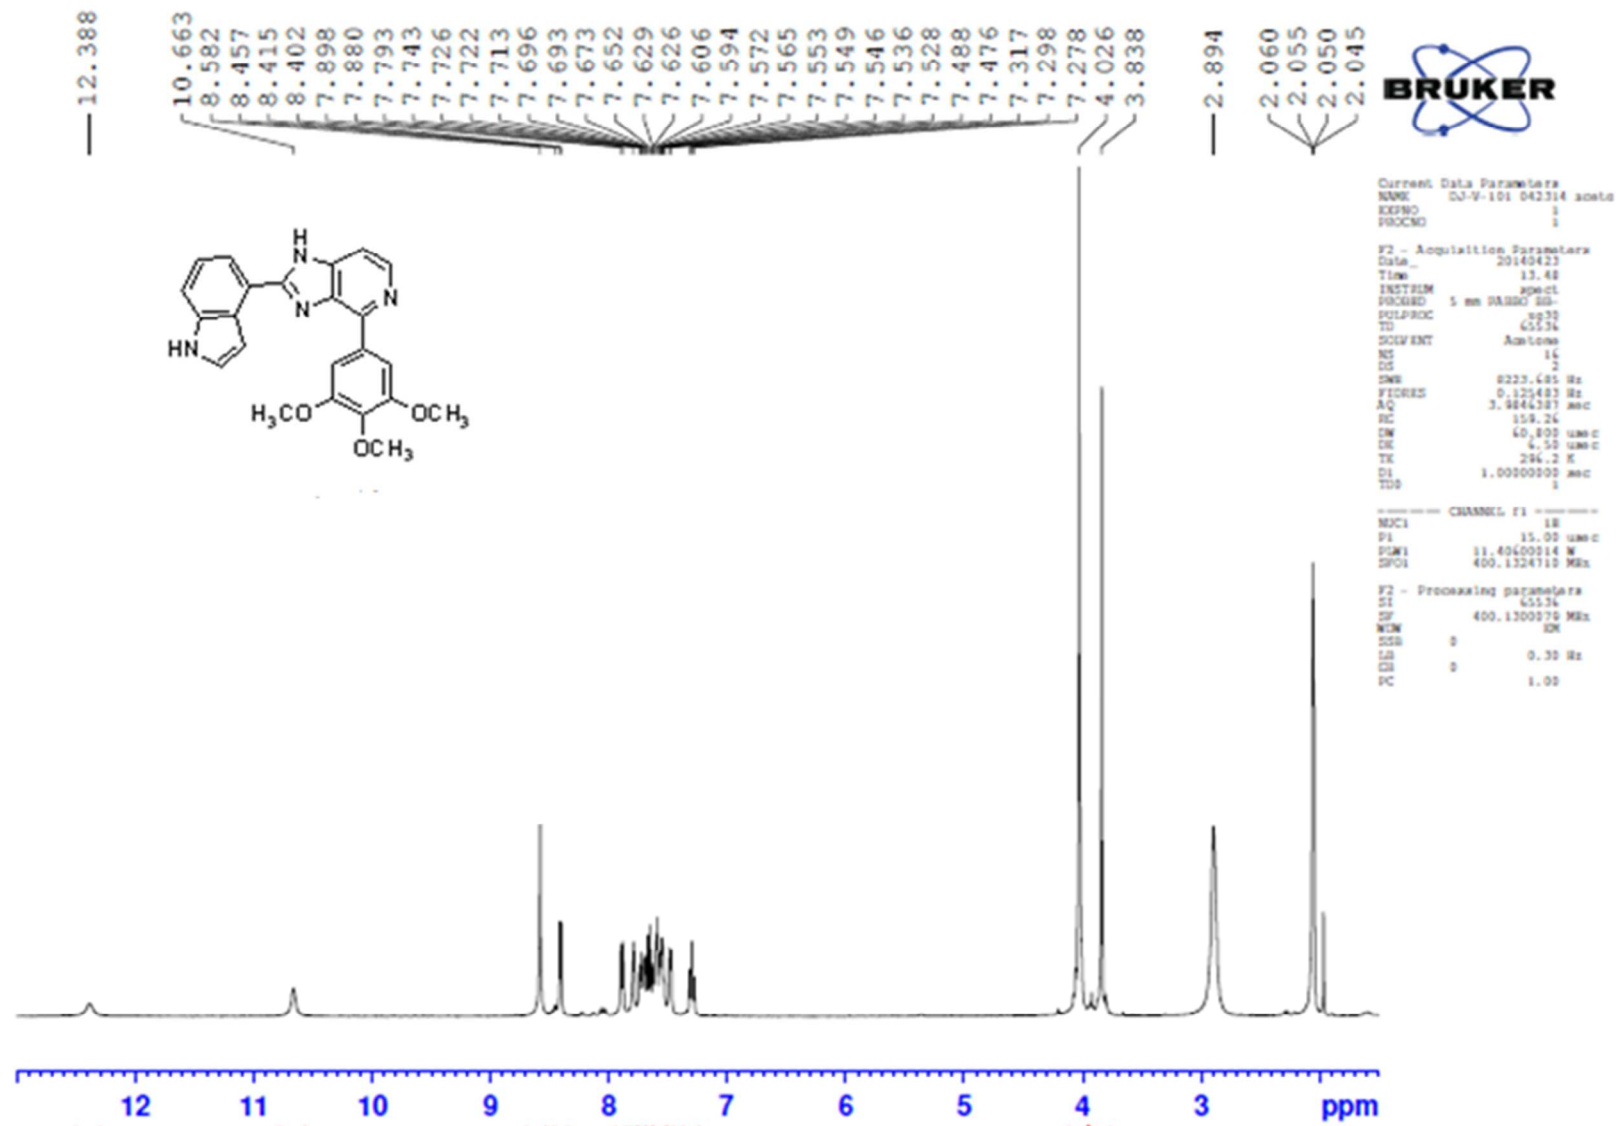

Compound **42**, 5-IIP: **HPLC** Analysis

Column: Phenomenex LUNA 5 $\mu$  C18

250\*4.6 mm

A: 55% water; B: 45% ACN Flow rate: 1.0 mL/min

Detection wave length = 340nm

**Purity 96.10%**

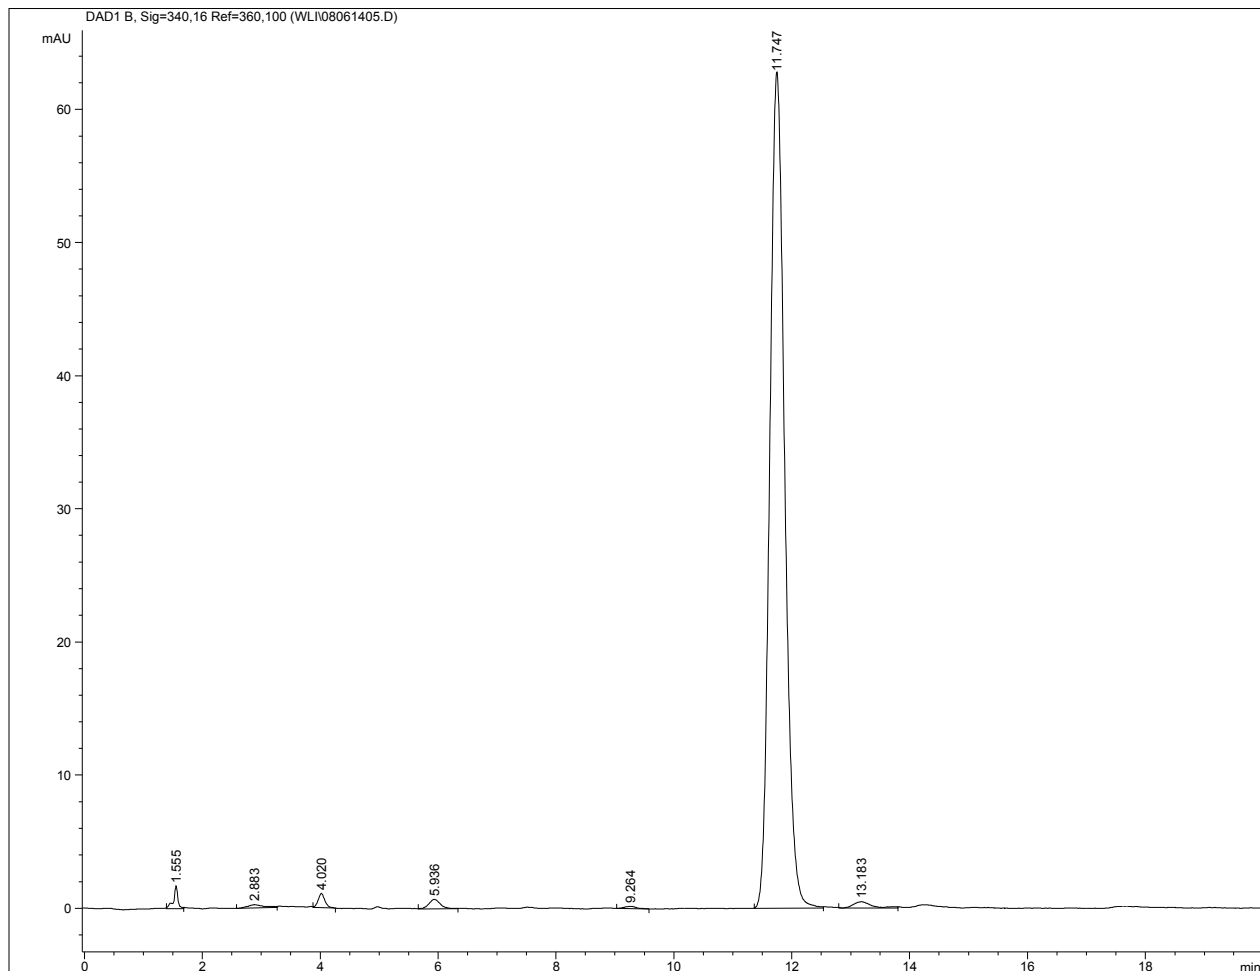



Compound **42**, 5-IIP: HRMS Analysis

DJ-V-107 729 (1.508)

1: TOF MS ES+  
1.49e6

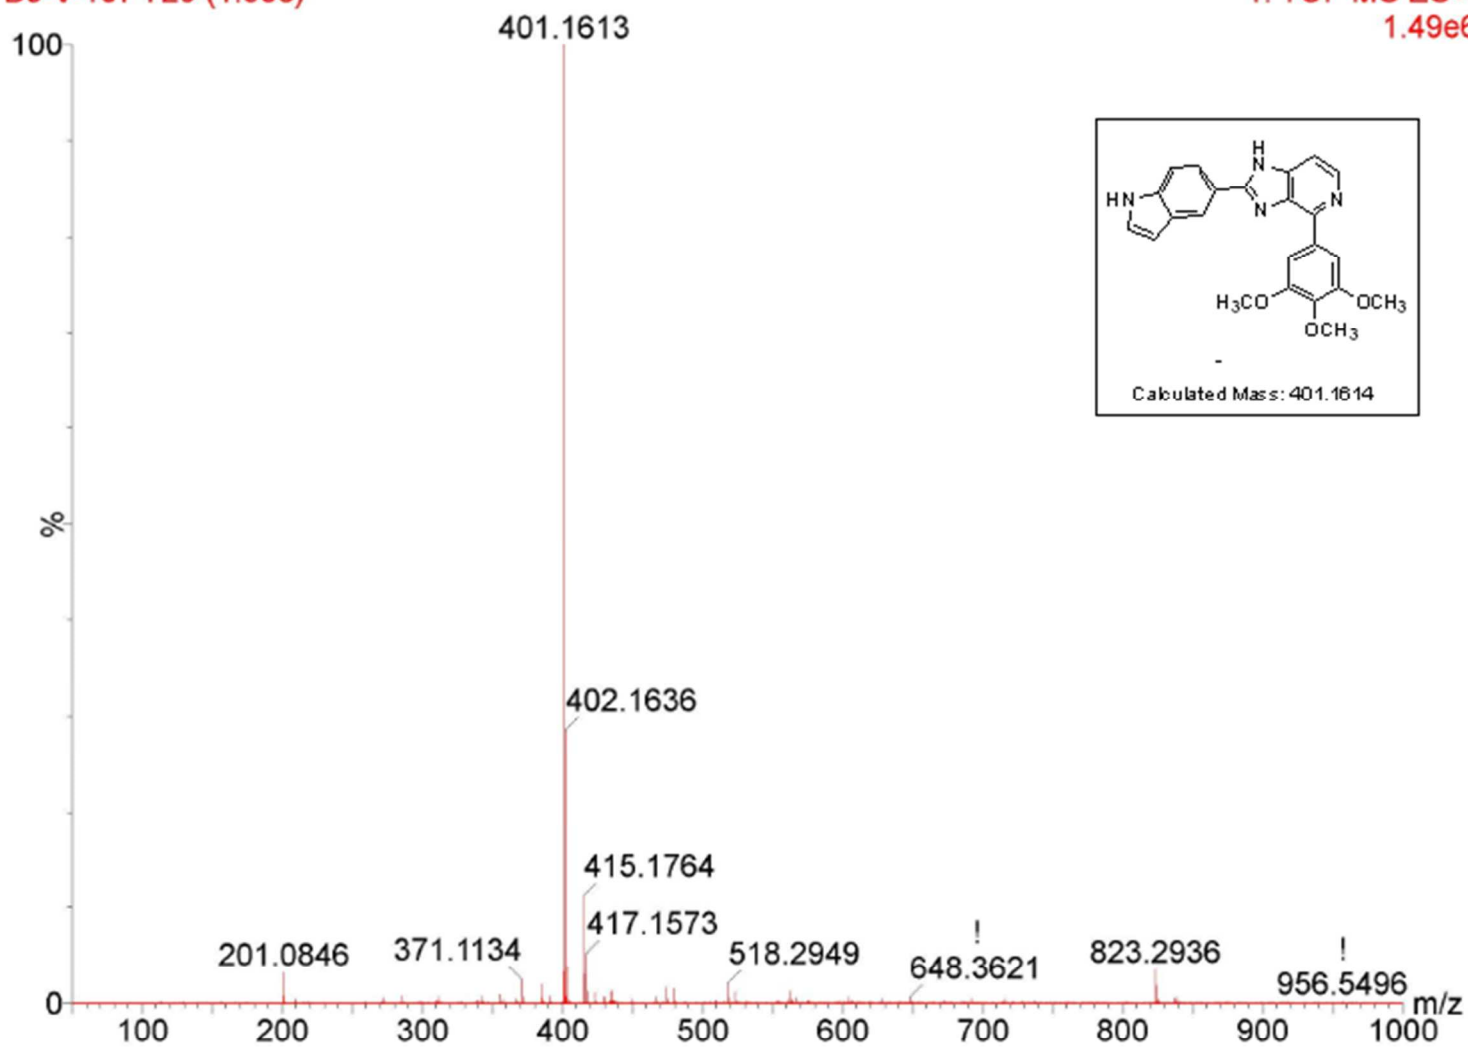

Compound **42**, 5-IIP:  $^1\text{H}$  NMR (Acetone  $d_6$ , 400 MHz)

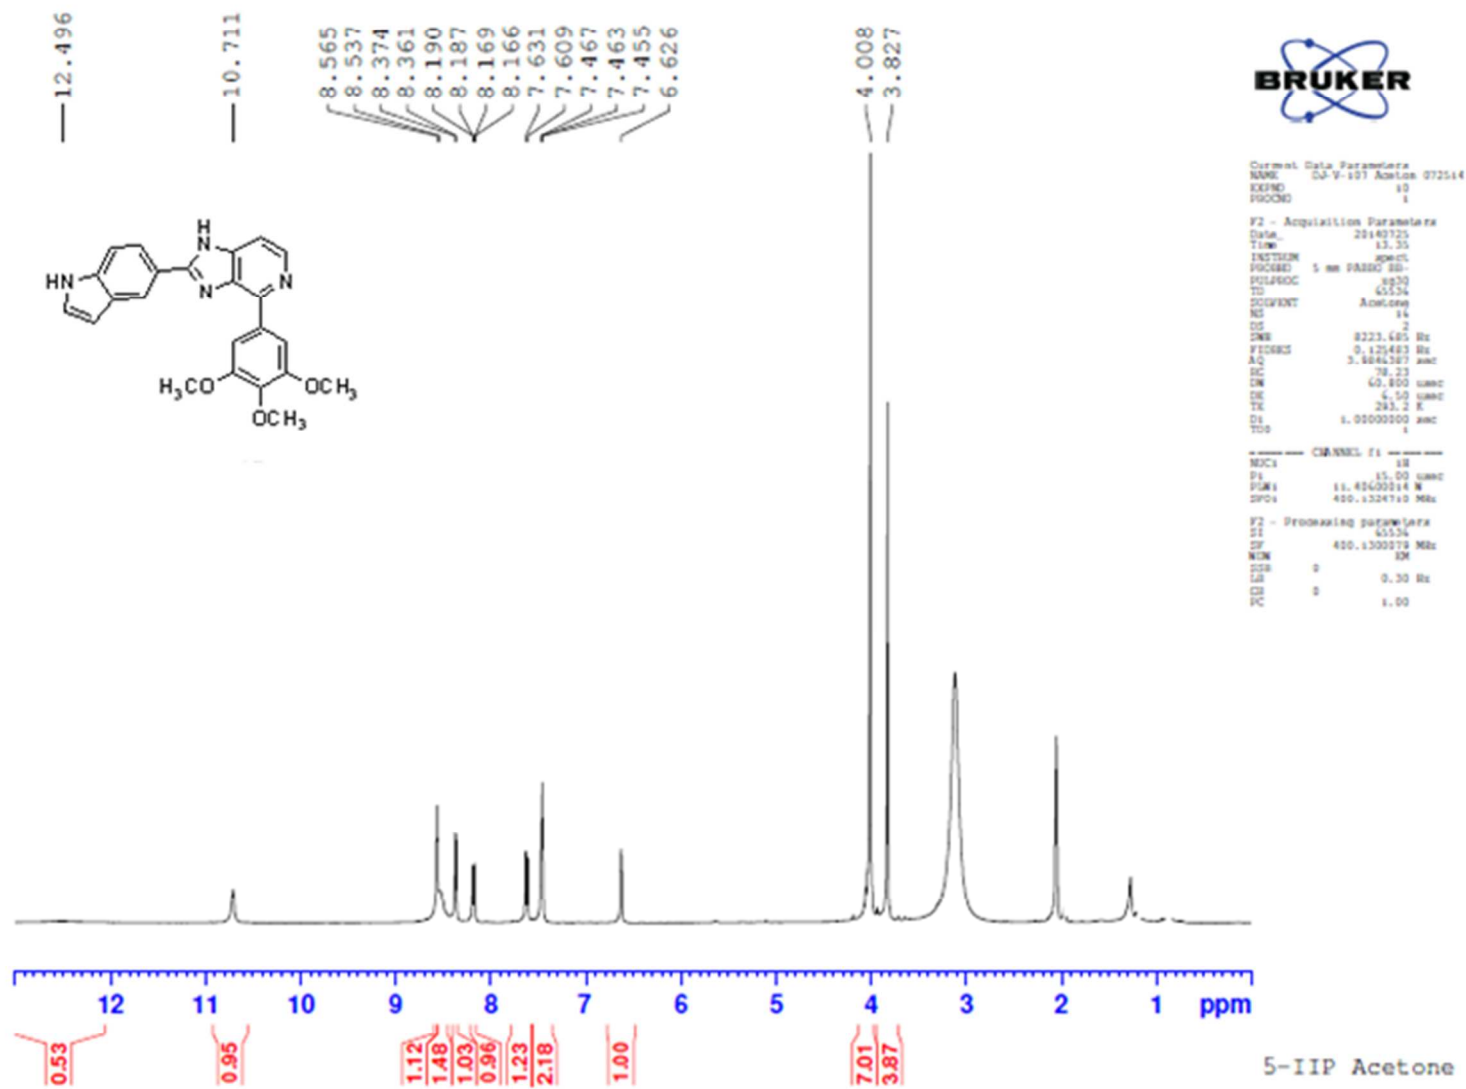

Compound **43**, 6-IIP: **HPLC** Analysis

Column: Phenomenex LUNA 5 $\mu$  C18

250\*4.6 mm

A: 55% water; B: 45% ACN Flow rate: 1.0 mL/min

Detection wave length = 340nm

Purity **97.44%**

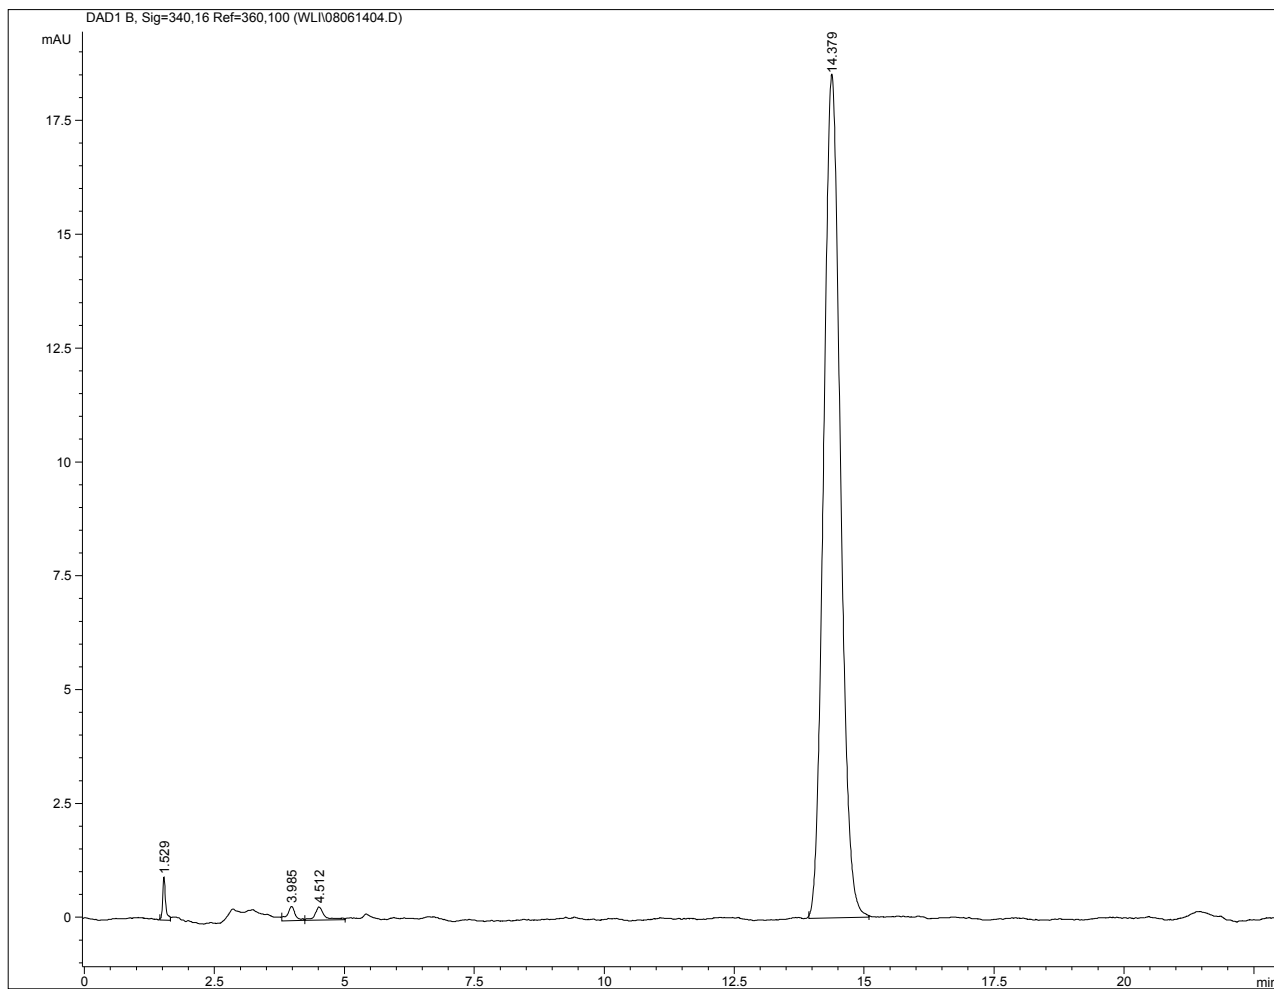

Compound **43**, 6-IIP: **HRMS** Analysis

DJ-5-95-H300-2 599 (2.456)

1: TOF MS ES+  
1.69e5

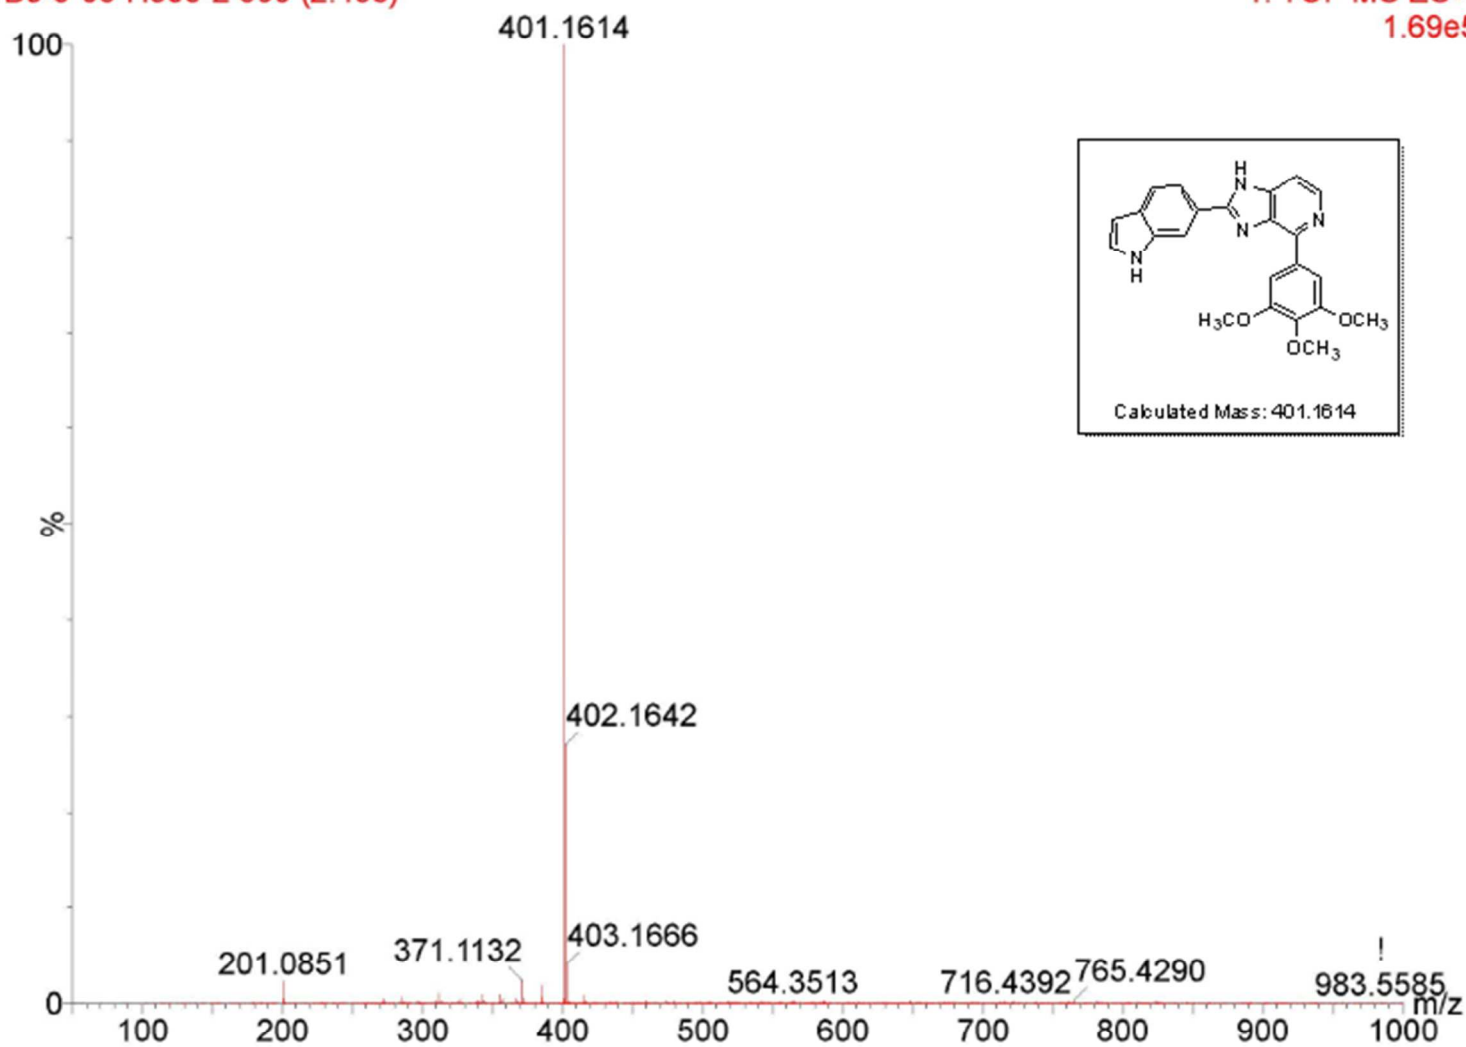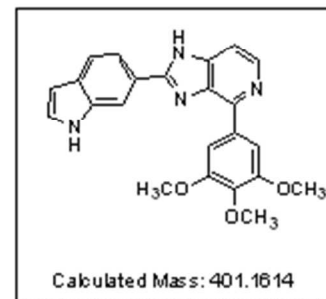

Compound **43**, 6-IIP:  $^1\text{H}$  NMR (Acetone  $d_6$ , 400 MHz)

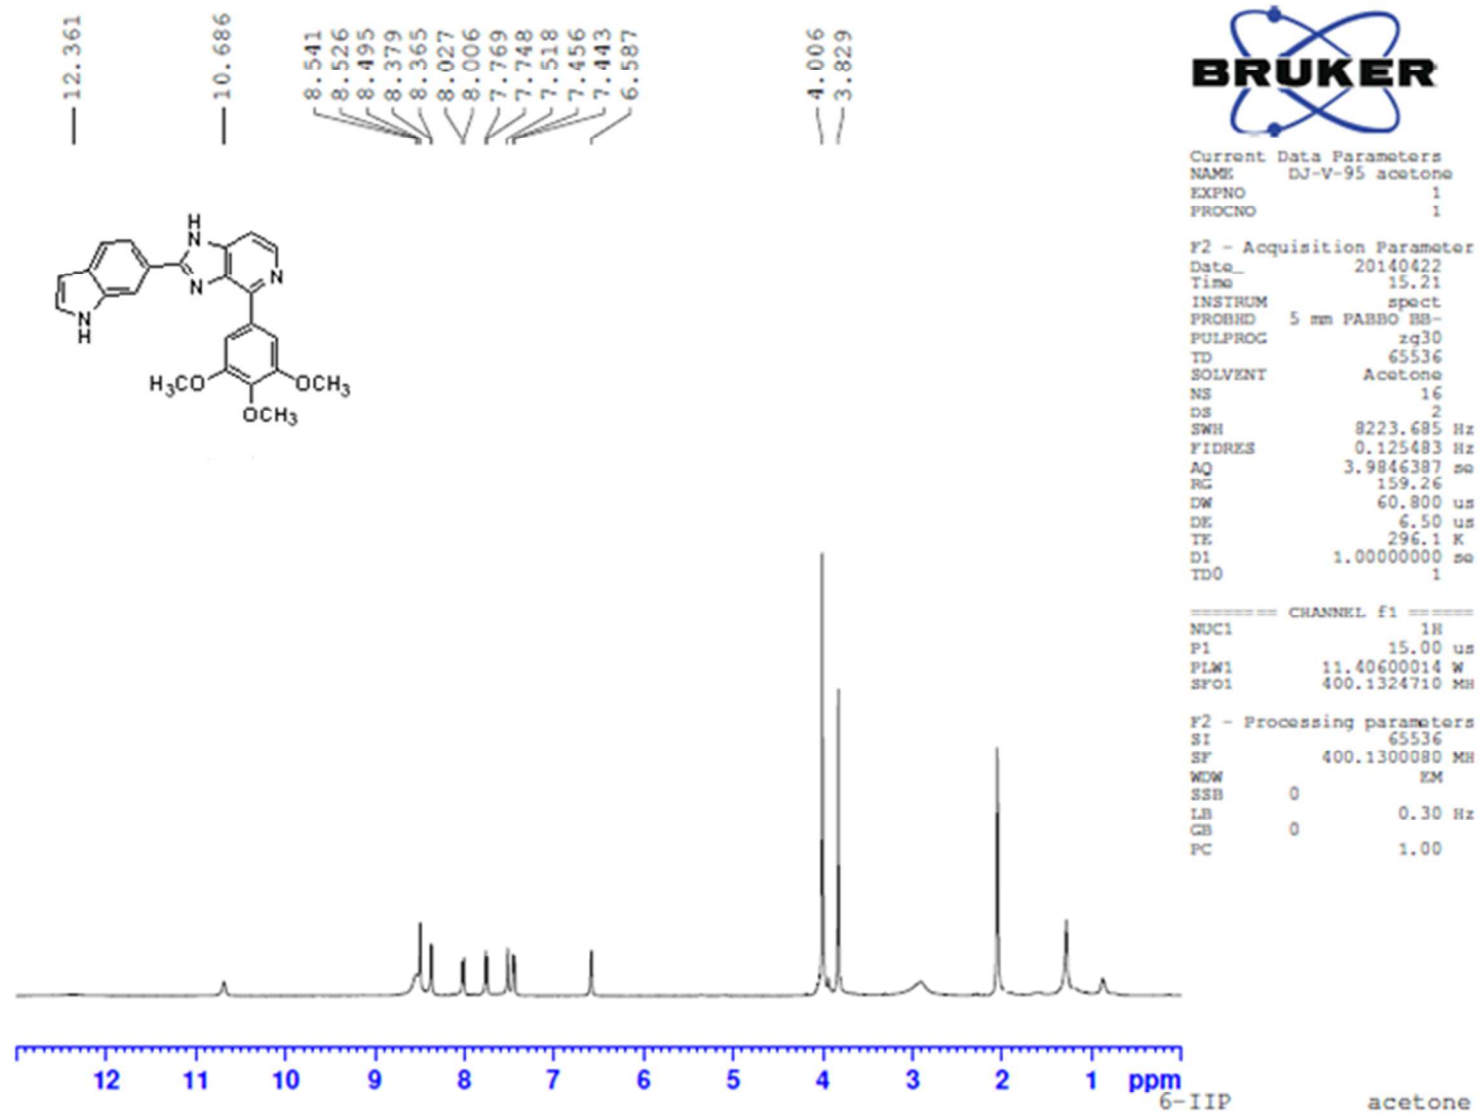

Compound **43**, 6-IIP:  $^1\text{H}$ - $^1\text{H}$  Cosy NMR (Acetone  $d_6$ , 400 MHz)

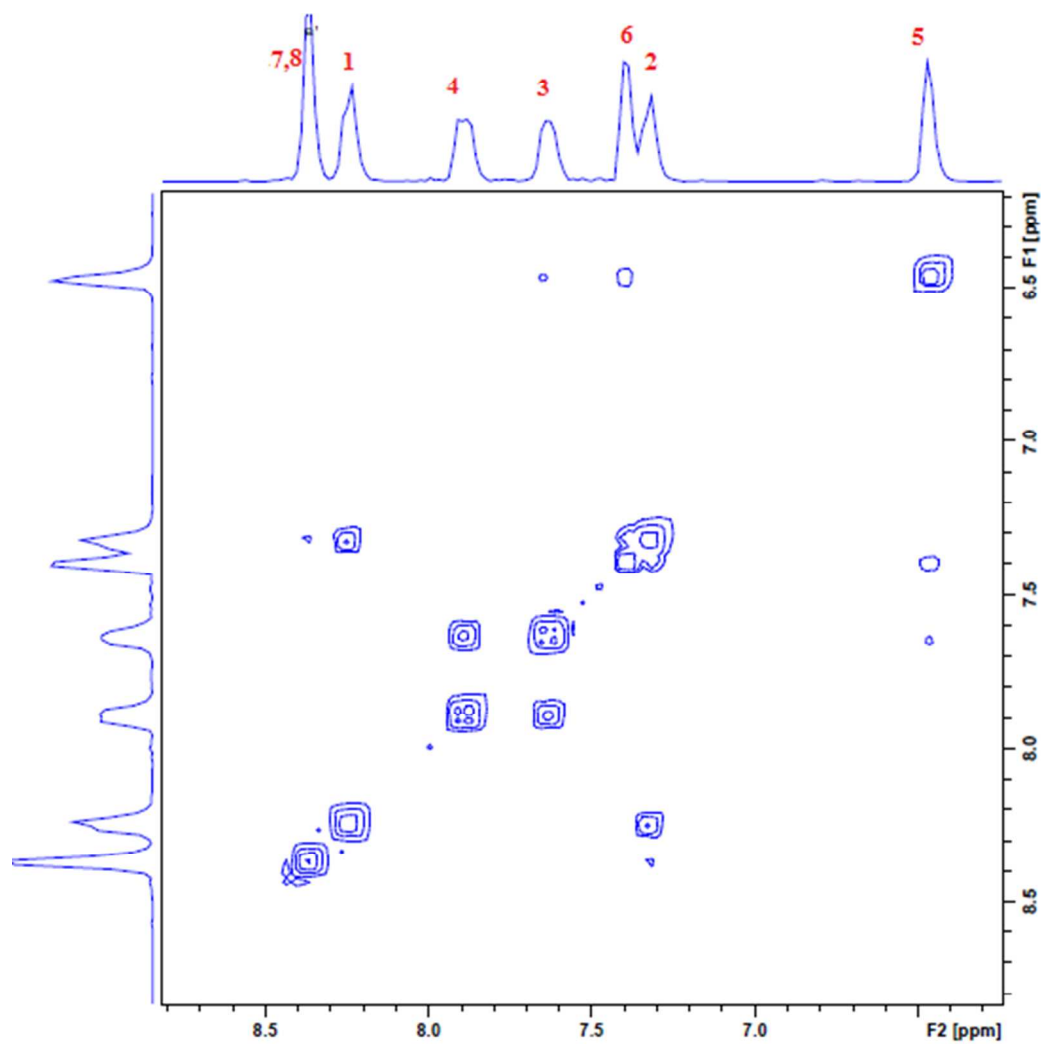

\*DJ-V-95 acetone

C:\Bruker\TopSpin3.0\data\dhwang\nmr

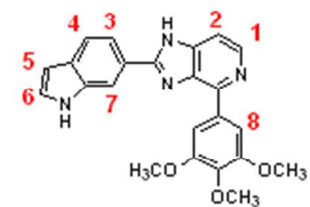

Compound **44**, 7-IIP: **HPLC** Analysis

Column: Phenomenex LUNA 5 $\mu$  C18

250\*4.6 mm

A: 55% water; B: 45% ACN Flow rate: 1.0 mL/min

Detection wave length = 245 nm

**Purity >99%**

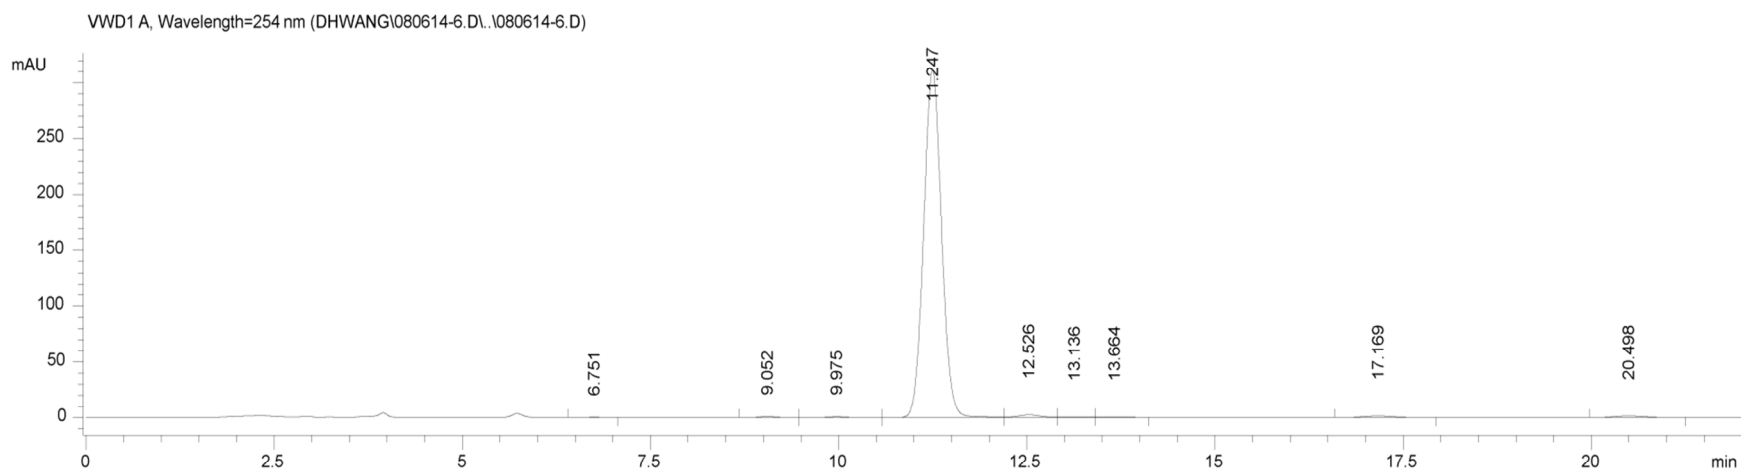

Compound **44**, 7-IIP: HRMS Analysis

DJV49-2 415 (3.673)

1: TOF MS ES+  
4.31e6

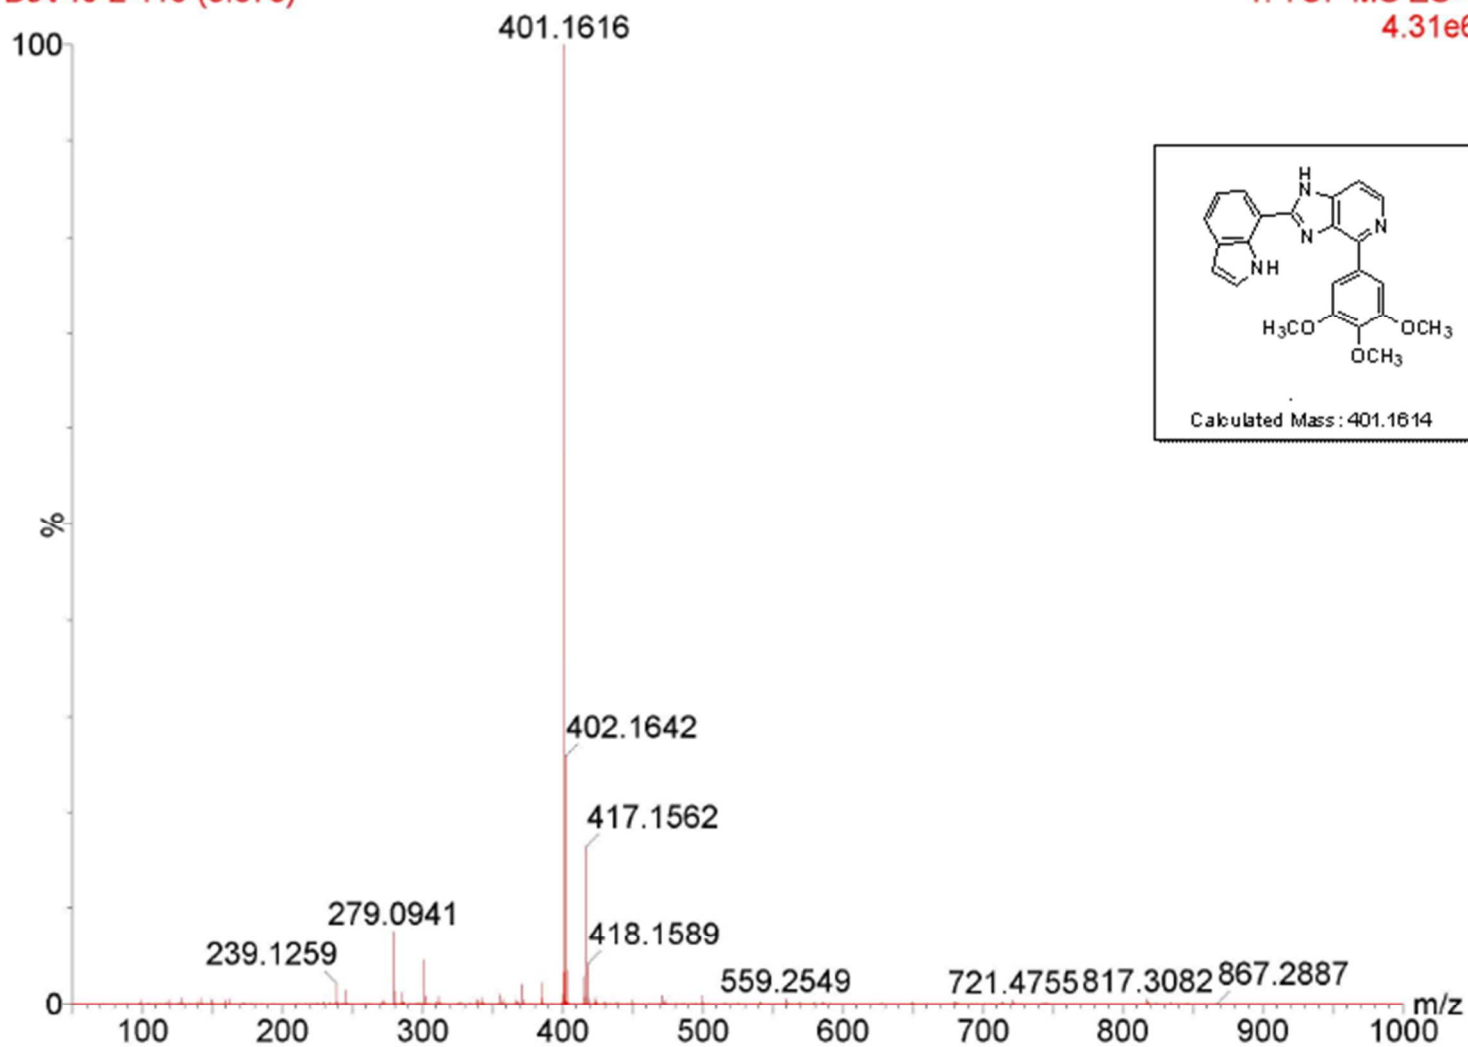



Compound **44a**: HPLC Analysis

Column: Phenomenex LUNA 5 $\mu$  C18

250\*4.6 mm

A: 55% water; B: 45% ACN Flow rate: 1.0 mL/min

Detection wave length = 245 nm

Purity >99%

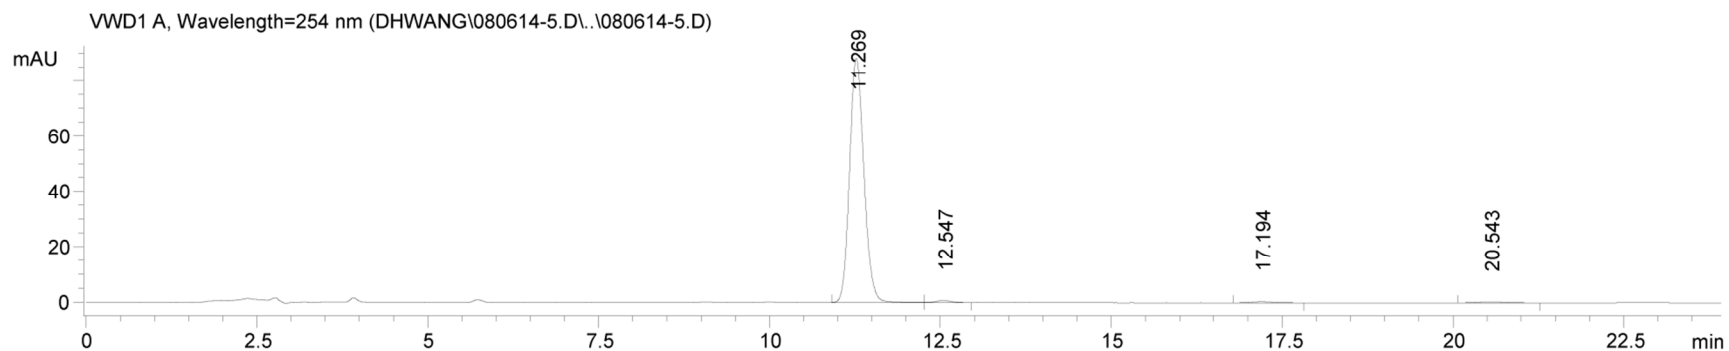

Compound **44a**: HRMS Analysis

DJV278 64 (0.582)

1: TOF MS ES+  
2.93e6

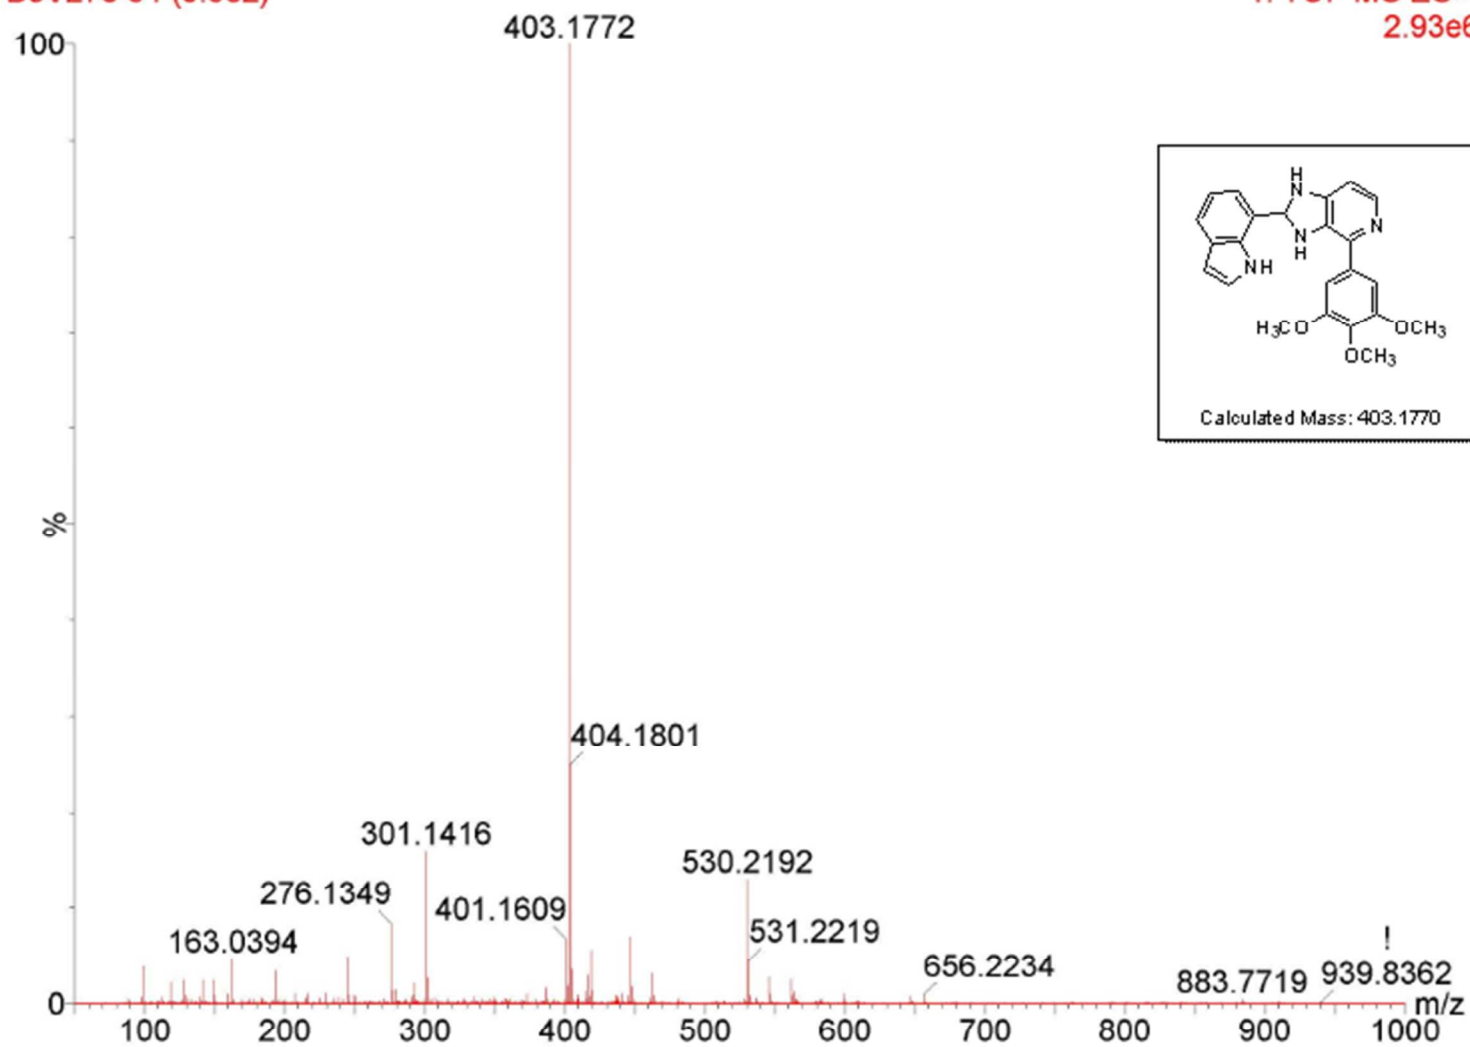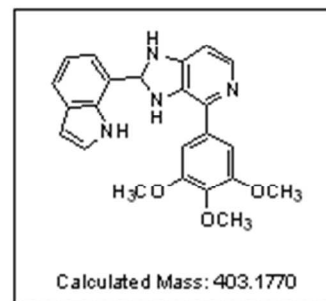

Compound **44a**:  $^1\text{H}$  NMR ( $\text{CDCl}_3$ , 400 MHz)

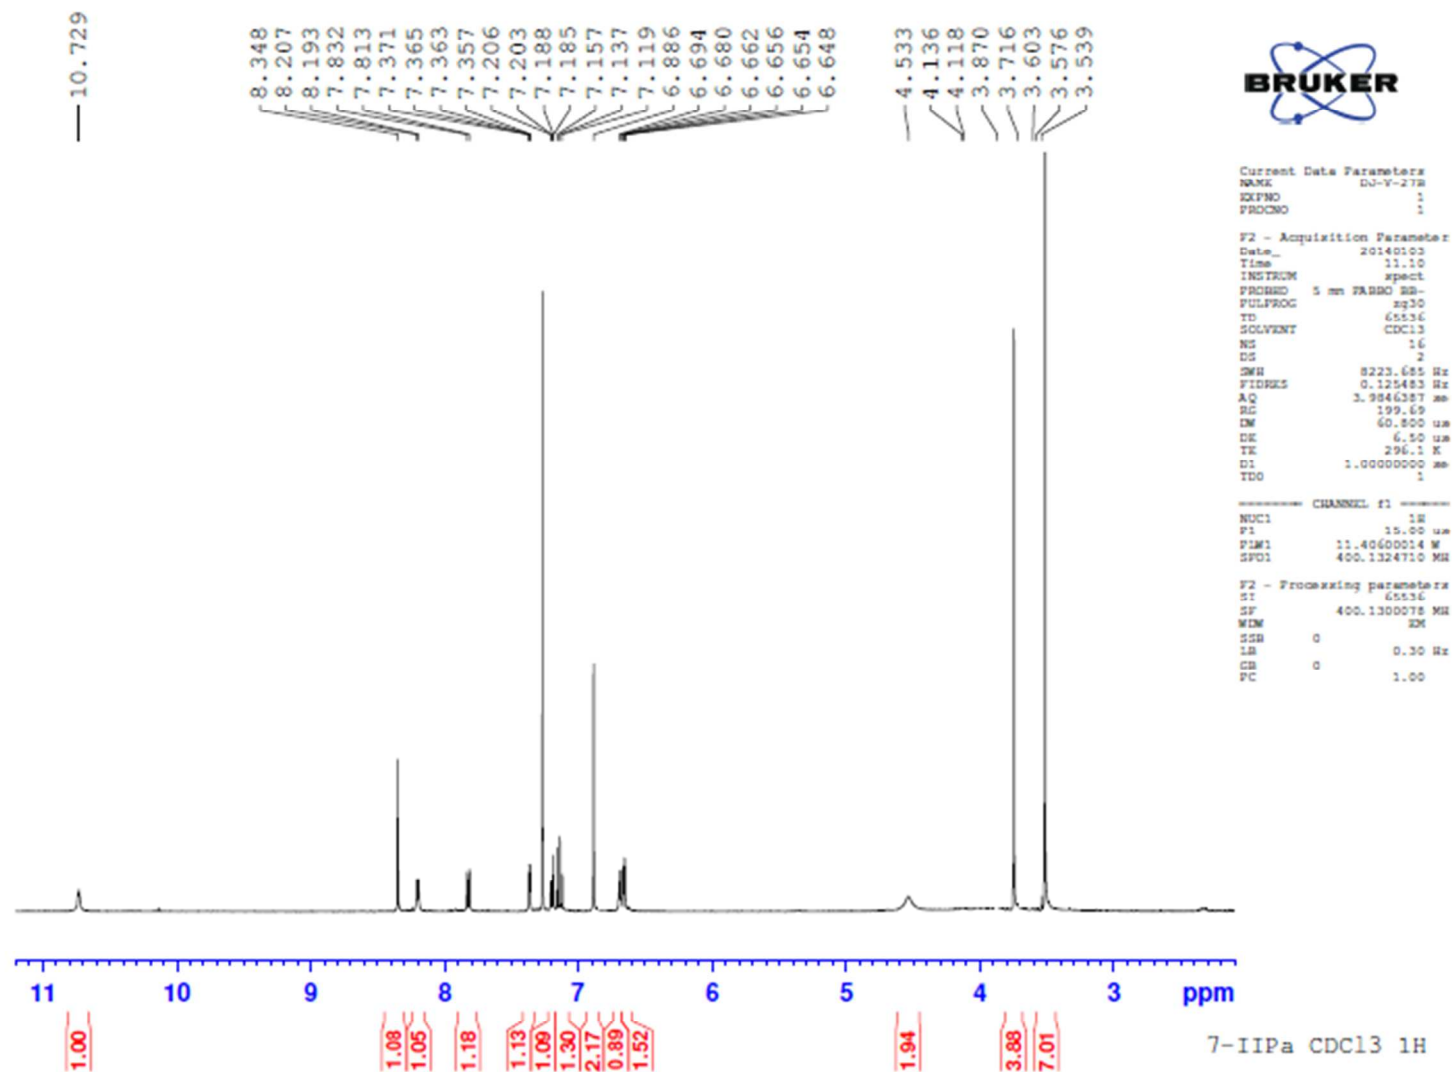

Compound **44a**:  $^1\text{H}$ - $^1\text{H}$  Cosy NMR ( $\text{CDCl}_3$ , 400 MHz)

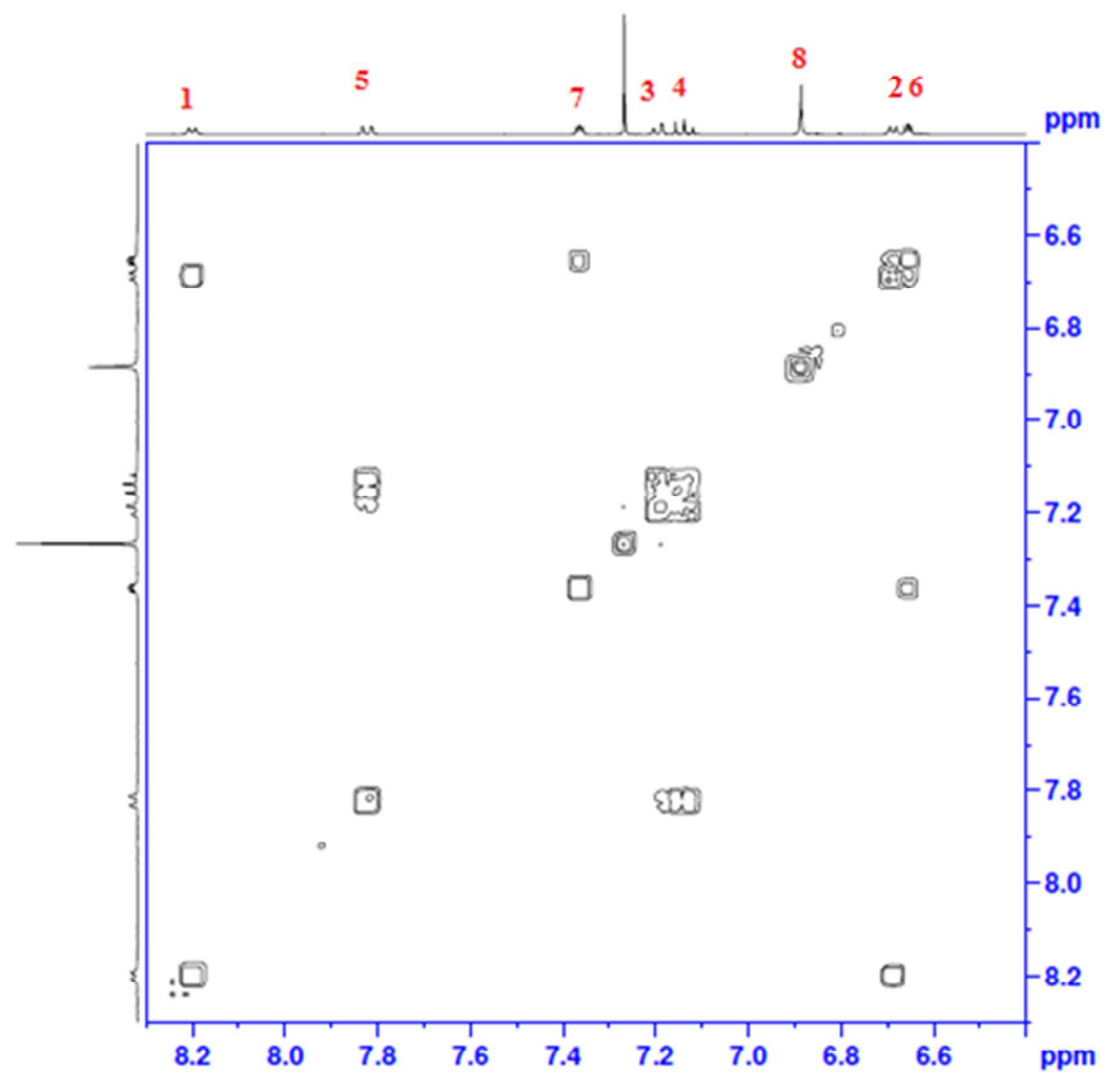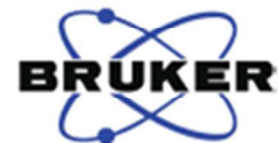

Current Data Parameters  
 NAME D3-V-27B  
 EXPNO 2  
 PROCNO 1

F2 - Acquisition Parameters  
 Date\_ 20140103  
 Time 11.19  
 INSTRUM spect  
 PROBRD 5 mm PABBO BB-  
 PULPROG cosy gpgpgf  
 TD 2048  
 SOLVENT  $\text{CDCl}_3$   
 NS 1  
 DS 8  
 SWH 3267.974 Hz  
 FIDRES 1.595690 Hz  
 AQ 0.3133940 sec  
 RG 132.71  
 DW 153.000 usec  
 DE 6.50 usec  
 TE 296.2 K  
 D0 0.0000300 sec  
 D1 1.87834895 sec  
 D11 0.03000000 sec  
 D12 0.00002000 sec  
 D13 0.00000400 sec  
 D16 0.00020000 sec  
 INO 0.00030600 sec

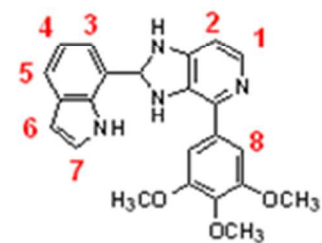

Compound **24**, 6-CHO:  $^1\text{H}$  NMR ( $\text{CDCl}_3$ , 400 MHz)

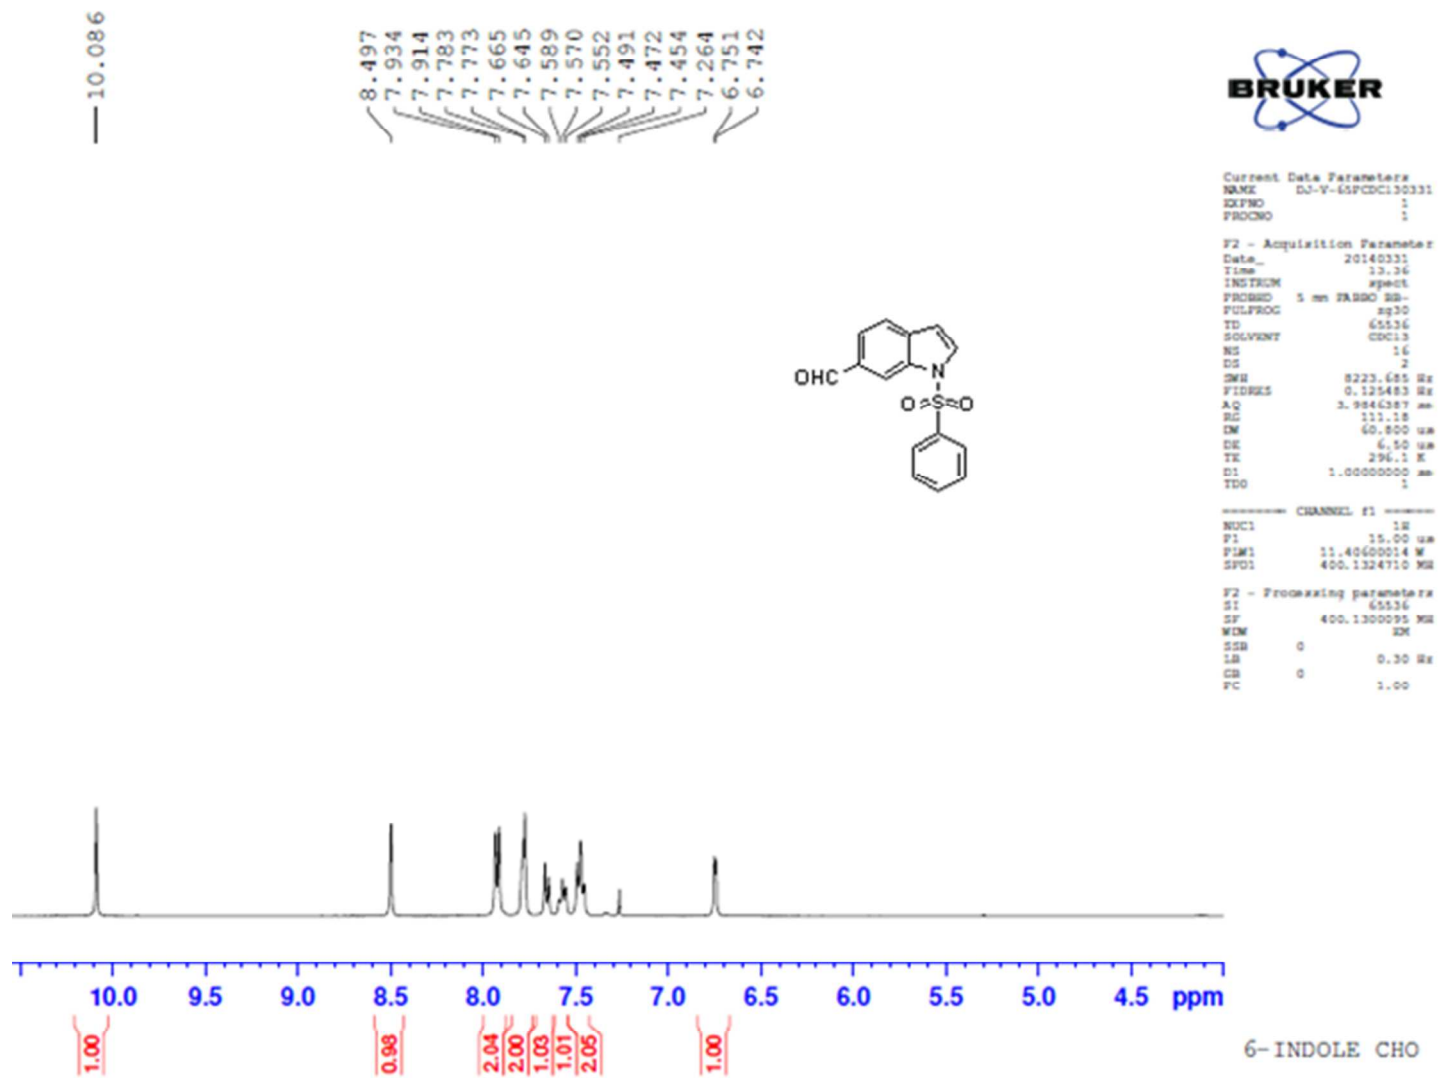

Compound **24**, 6-CHO:  $^1\text{H}$ - $^1\text{H}$  **Cosy NMR** ( $\text{CDCl}_3$ , 400 MHz)

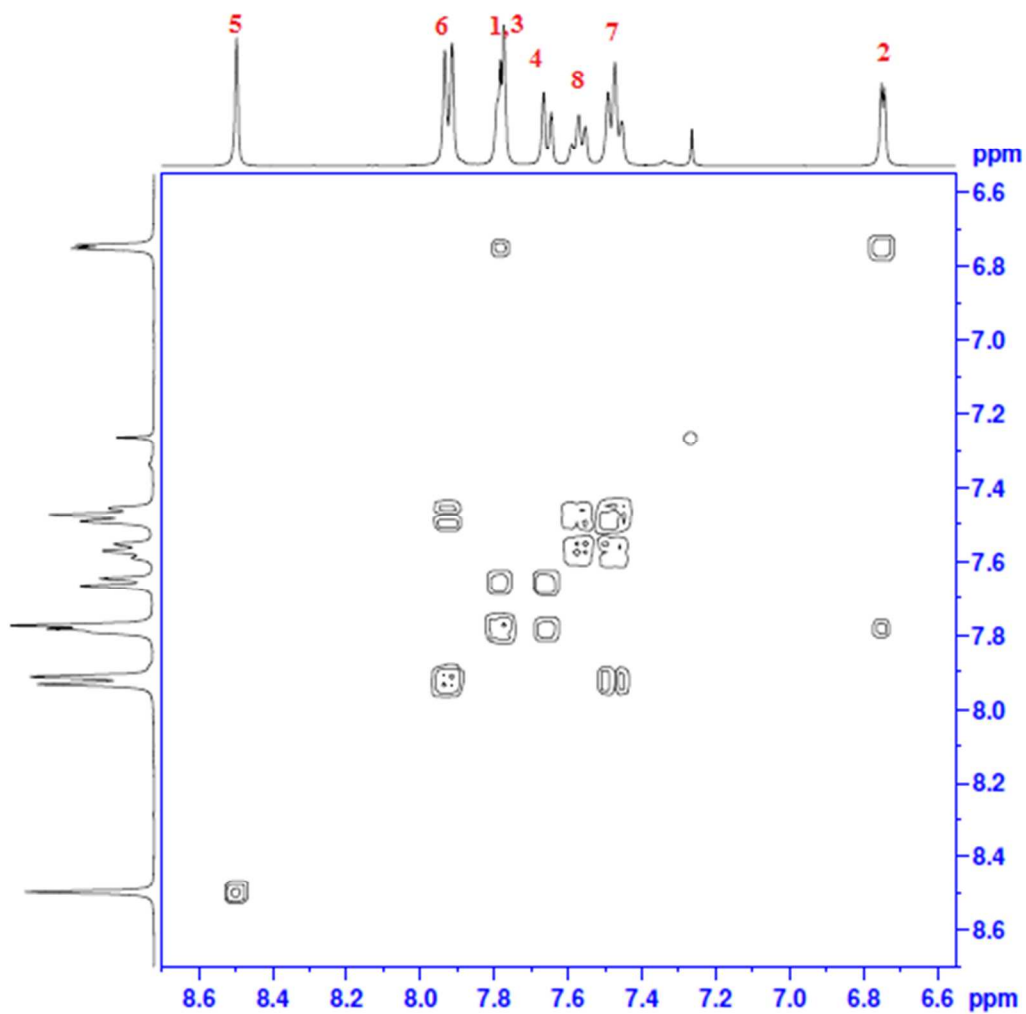

6-CHO 010515

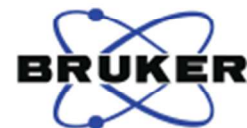

Current Data Parameters  
 NAME DJ-V-61PCDC13033114  
 KEFNO 2  
 PROCNO 1

F2 - Acquisition Parameters  
 Date\_ 20140331  
 Time\_ 13.37  
 INSTRUM spect  
 PROBRD 5 mm FAIMS BB-  
 PULPROG cosypppgpf  
 TD 2048  
 SOLVENT CDCl3  
 NS 1  
 DS 8  
 SWH 4761.905 Hz  
 FIDRES 2.325149 Hz  
 AQ 0.2150900 sec  
 SC 61.46  
 SM 105.000 usec  
 DE 6.50 usec  
 TE 296.1 K  
 D0 0.0000300 sec  
 D1 1.97665298 sec  
 D11 0.03000000 sec  
 D12 0.00002000 sec  
 D13 0.00004000 sec  
 D16 0.00000000 sec  
 INO 0.00021000 sec

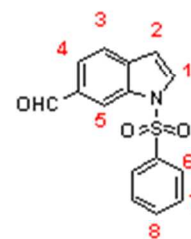

Compound **31**, 6-IIP-Br:  $^1\text{H}$  NMR (Acetone  $d_6$ , 400 MHz)

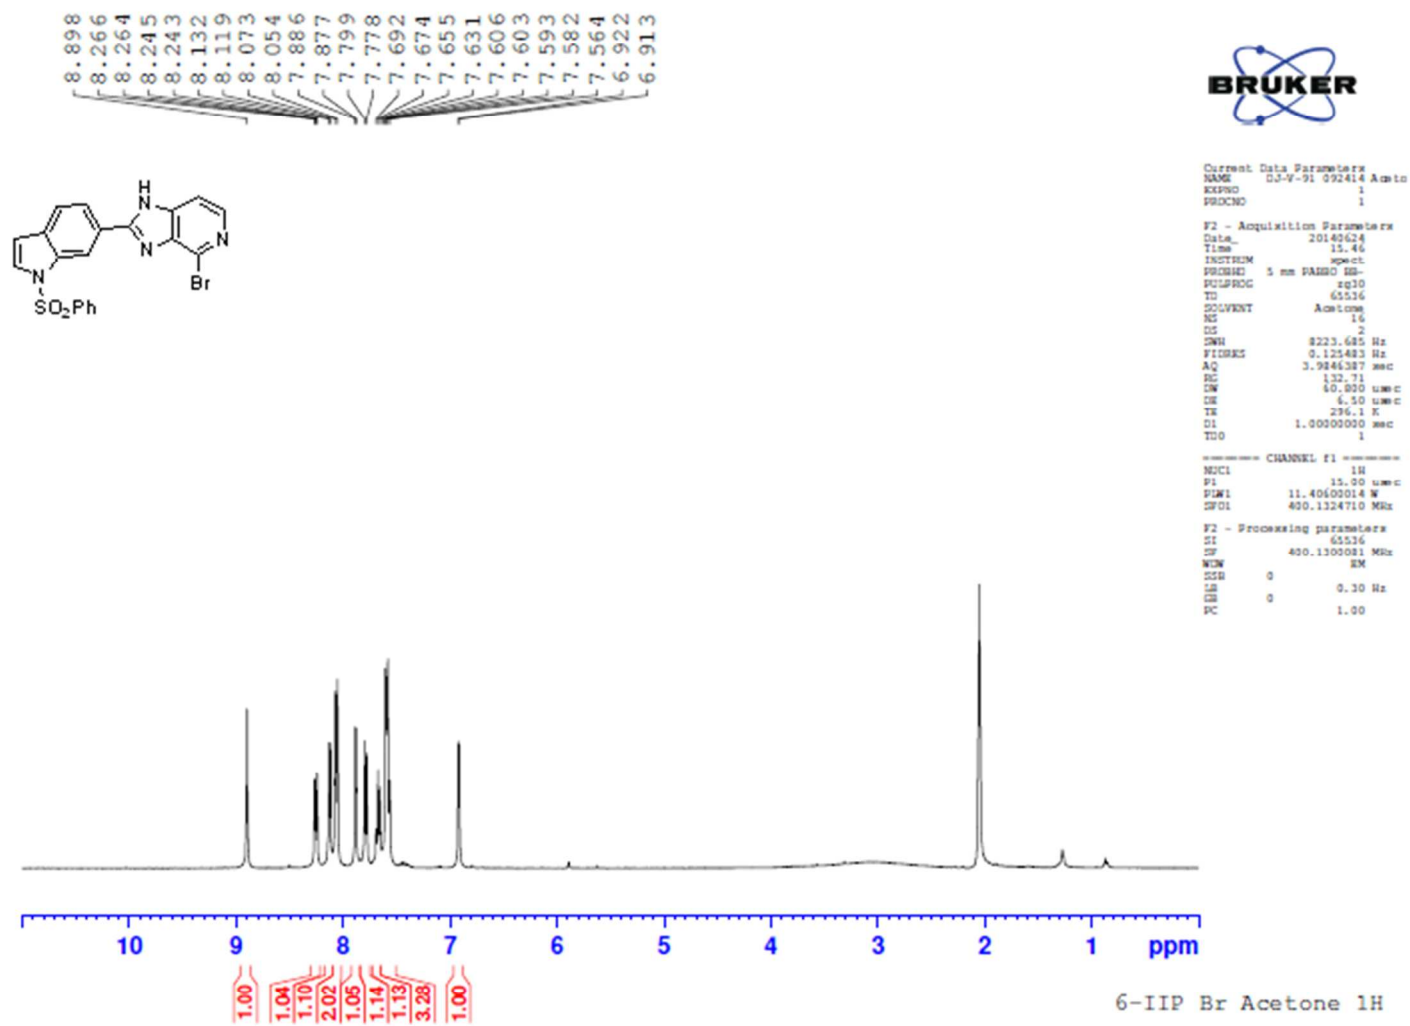

Compound **31**, 6-IIP-Br:  $^1\text{H}$ - $^1\text{H}$  Cosy NMR ( $\text{CDCl}_3$ , 400 MHz)

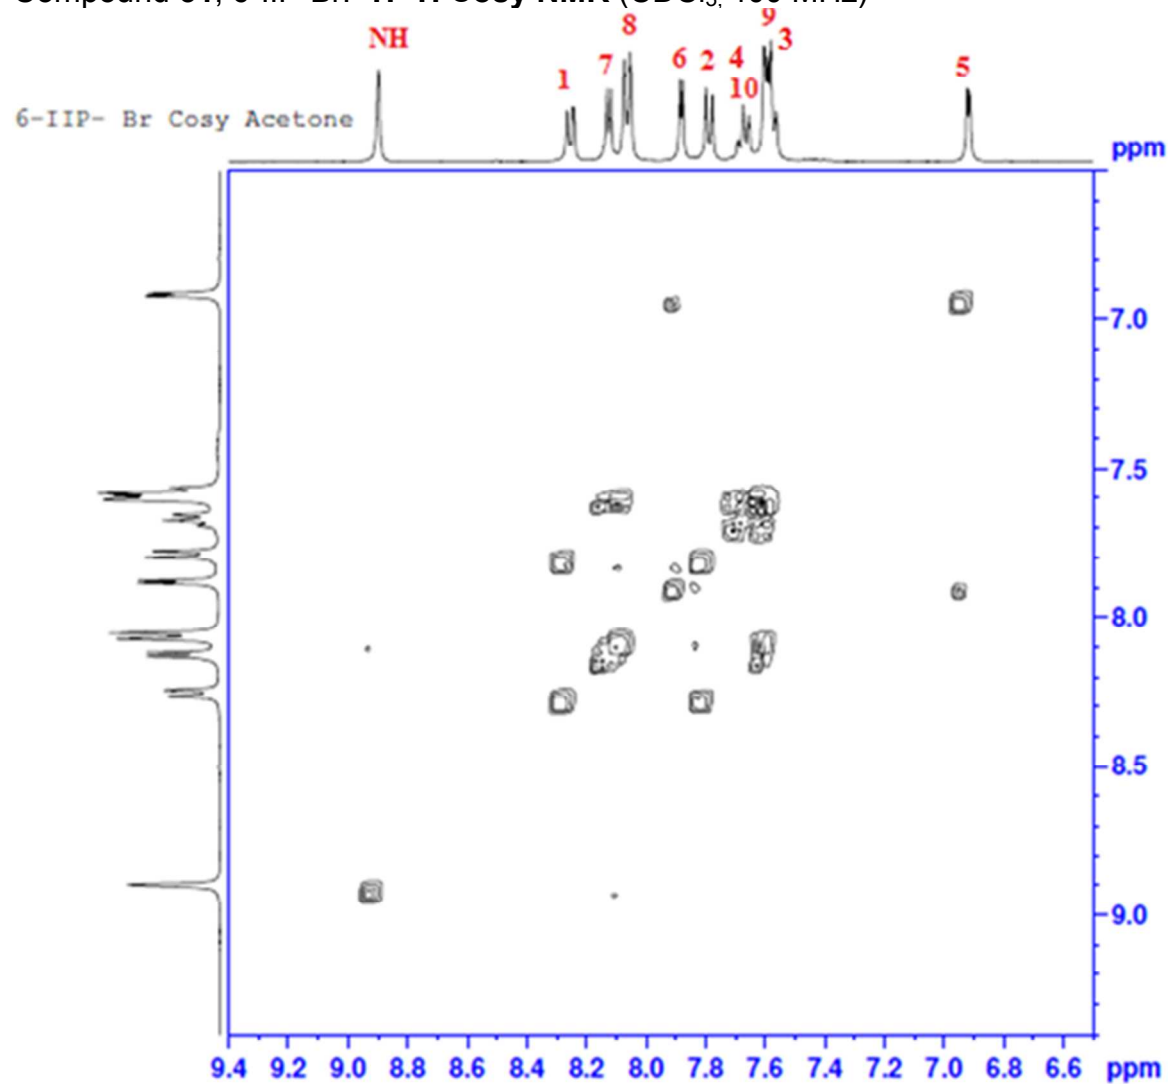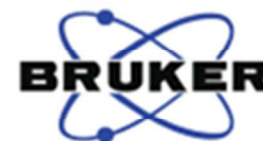

Current Data Parameters  
 NAME DJ-V-91 092414 Acetone  
 IXPNO 2  
 FPROCNO 1

F2 - Acquisition Parameters  
 Date\_ 20140224  
 Time 15.47  
 INSTRUM spect  
 PROBRD 5 mm FASBO SB-  
 PULPROG cosygpspof  
 TD 2048  
 SOLVENT Acetone  
 NS 1  
 DS 8  
 SWH 3875.969 Hz  
 FIDRES 1.892563 Hz  
 AQ 0.2642420 sec  
 RG 61.46  
 DW 129.000 usec  
 DE 6.50 usec  
 TE 296.2 K  
 D0 0.0000300 sec  
 D1 1.92750096 sec  
 D11 0.03000000 sec  
 D12 0.00002000 sec  
 D13 0.00006400 sec  
 D14 0.00020000 sec  
 DMO 0.00025800 sec

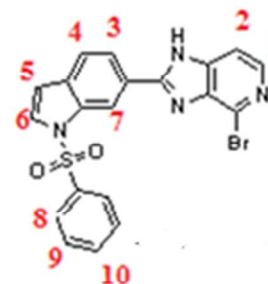



Compound **37**, 6-IIP-SO<sub>2</sub>Ph: <sup>1</sup>H NMR (Acetone d<sub>6</sub>, 400 MHz)

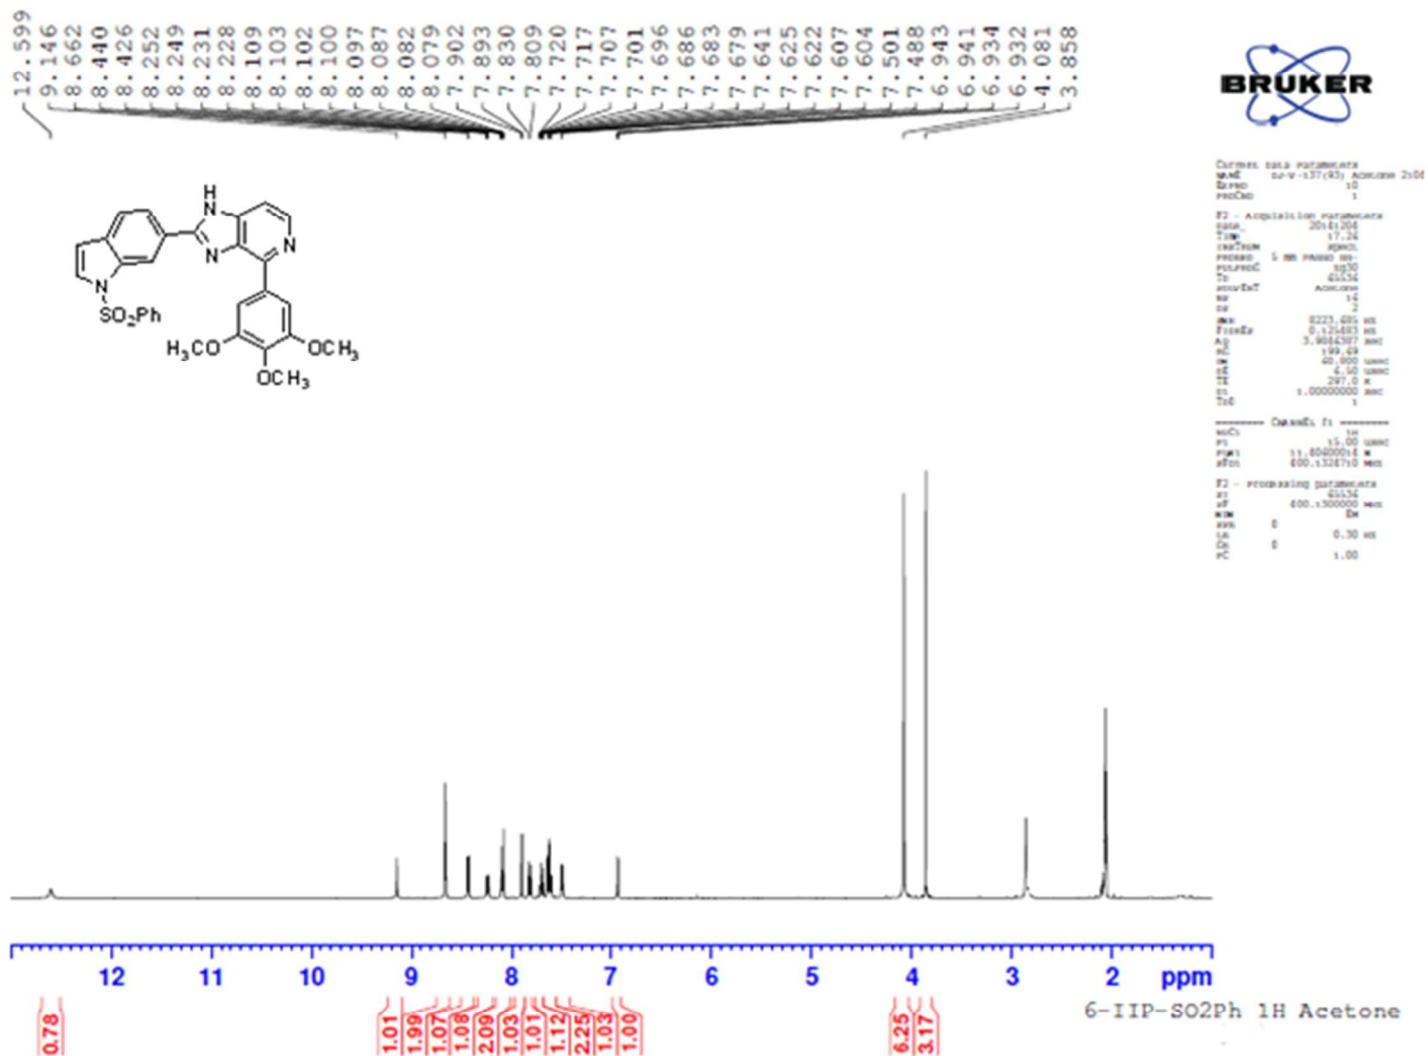

Compound **37**, 6-IIP-SO<sub>2</sub>Ph: <sup>1</sup>H-<sup>1</sup>H Cosy NMR (Acetone d<sub>6</sub>, 400 MHz)

Acetone 120514

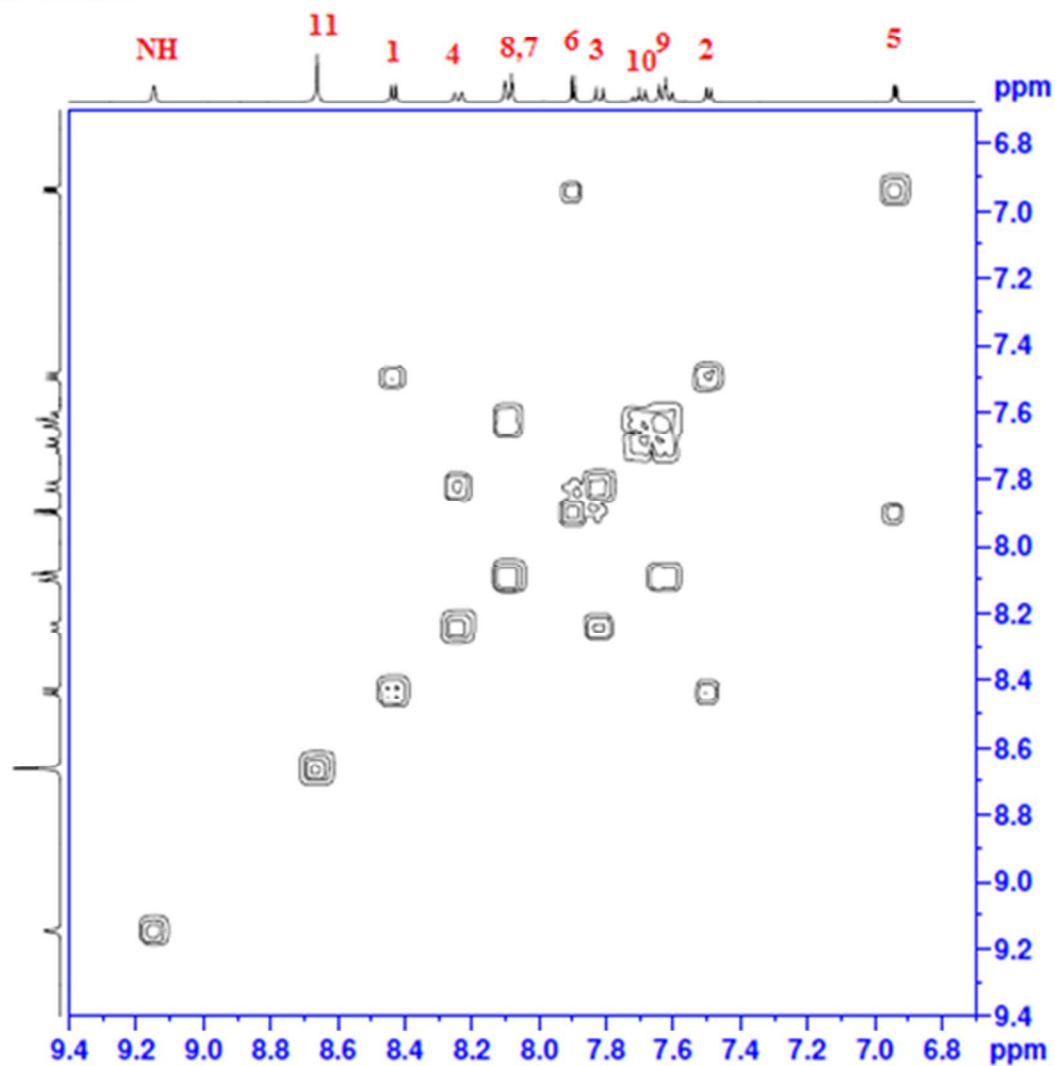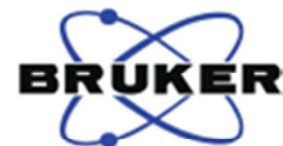

Current Data Parameters  
 NAME DJ-V-137(93) Acetone 210414  
 EXPNO 11  
 PROCNO 1

F2 - Acquisition Parameters

Date\_ 20141204  
 Time 17.28  
 INSTRUM spect  
 PROBRD 5 mm F400 BB-  
 PULPROG cosypppgf  
 TD 2048  
 SOLVENT Acetone  
 NS 1  
 DS 8  
 SWH 5376.344 Hz  
 FREQS 2.425168 Hz  
 AQ 0.1905140 sec  
 PC 119.4  
 DM 93.000 usec  
 DE 6.50 usec  
 TK 297.0 K  
 D0 0.00000000 usec  
 D1 2.00122905 usec  
 D11 0.03000000 usec  
 D12 0.00002000 usec  
 D13 0.00000400 usec  
 D16 0.00020000 usec  
 IM0 0.00018600 usec

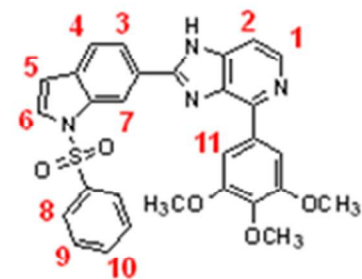

Compound **30**, 5-IIP-Br: **HRMS** Analysis

DJ-V-103 906 (1.868)

1: TOF MS ES+  
1.46e6

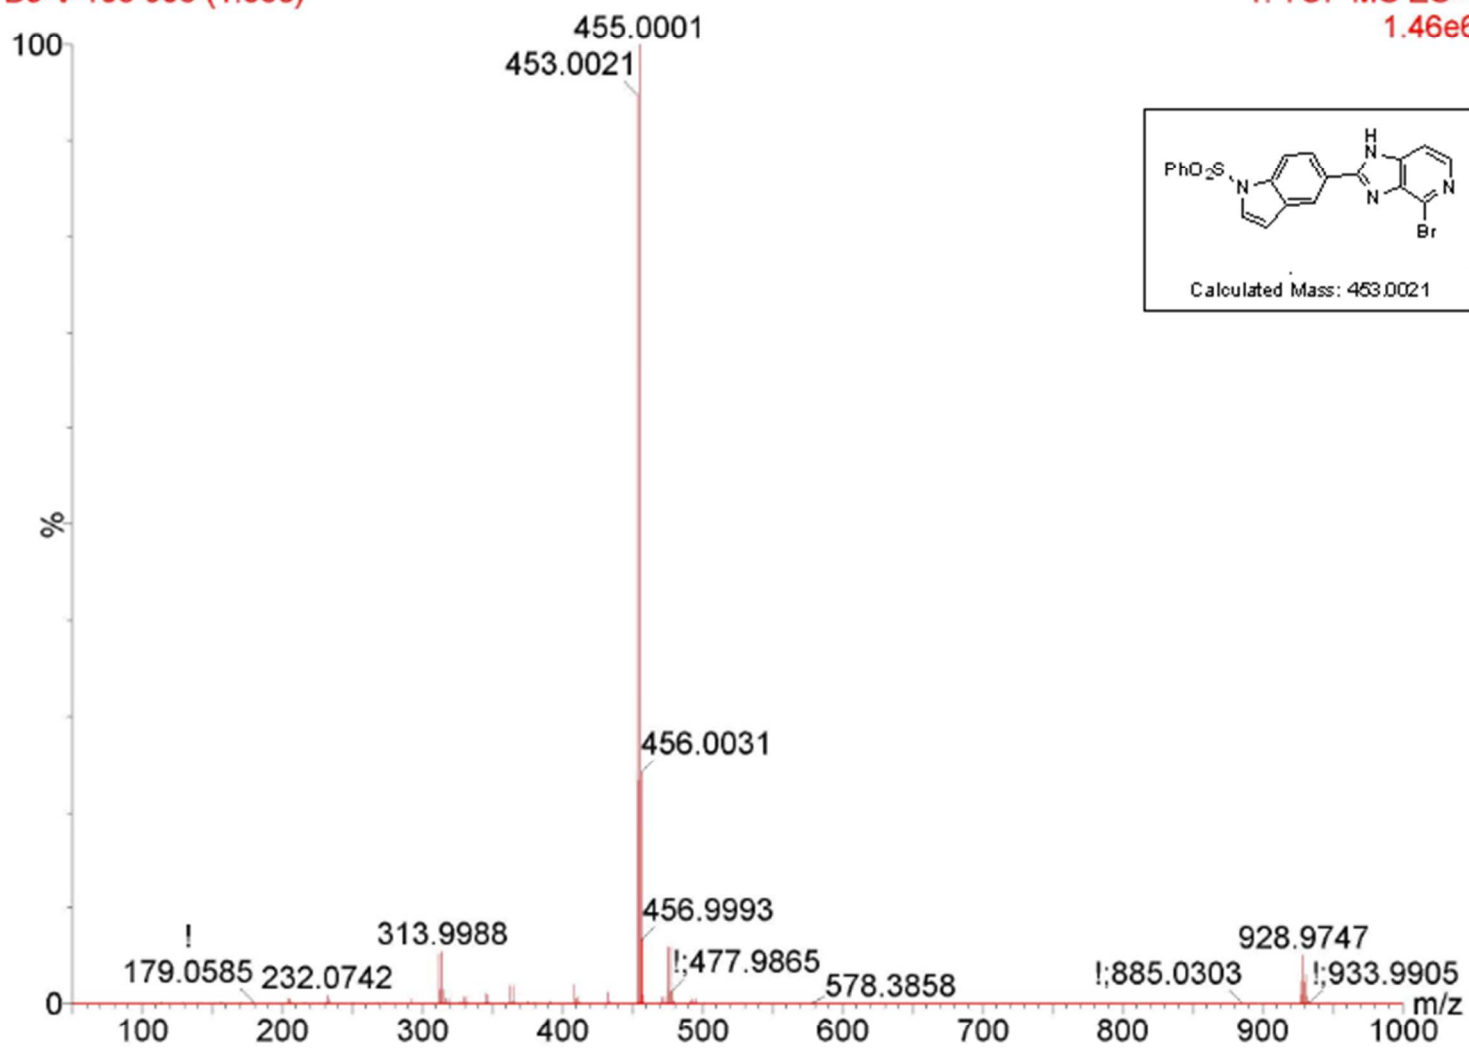

Compound **32**, 7-IIP-Br: **HRMS** Analysis

DJ-V-45 861 (1.782)

1: TOF MS ES+  
1.28e6

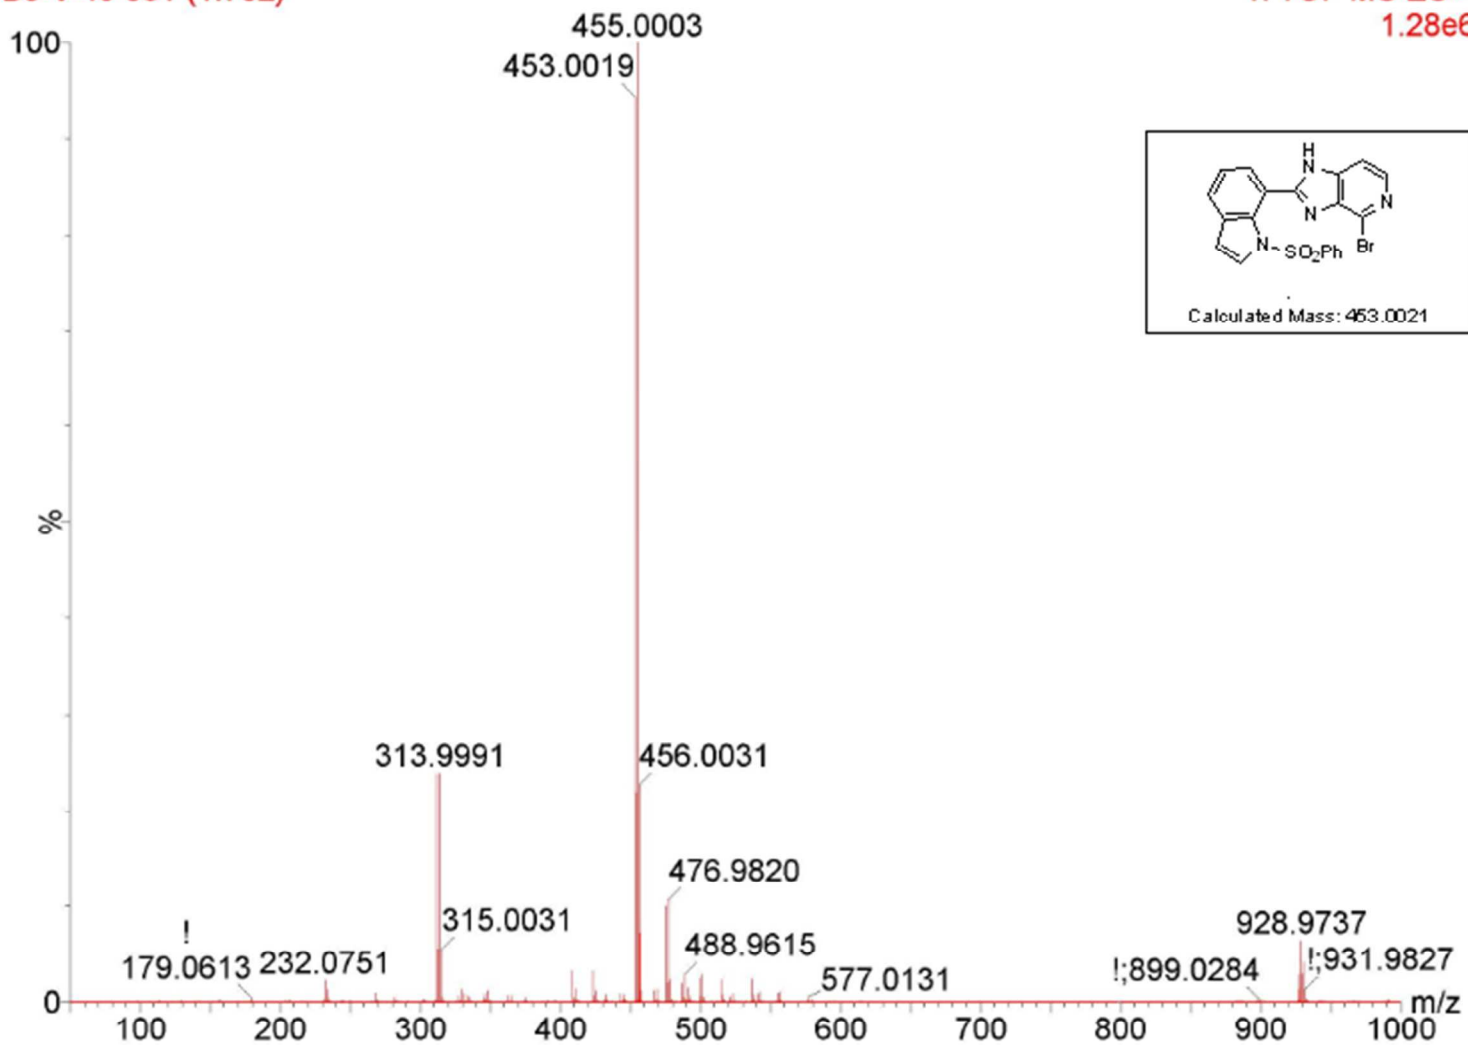

Compound **36**, 5-IIP-SO<sub>2</sub>Ph: **HRMS** Analysis

DJ-V-105 984 (2.028)

1: TOF MS ES+  
1.69e6

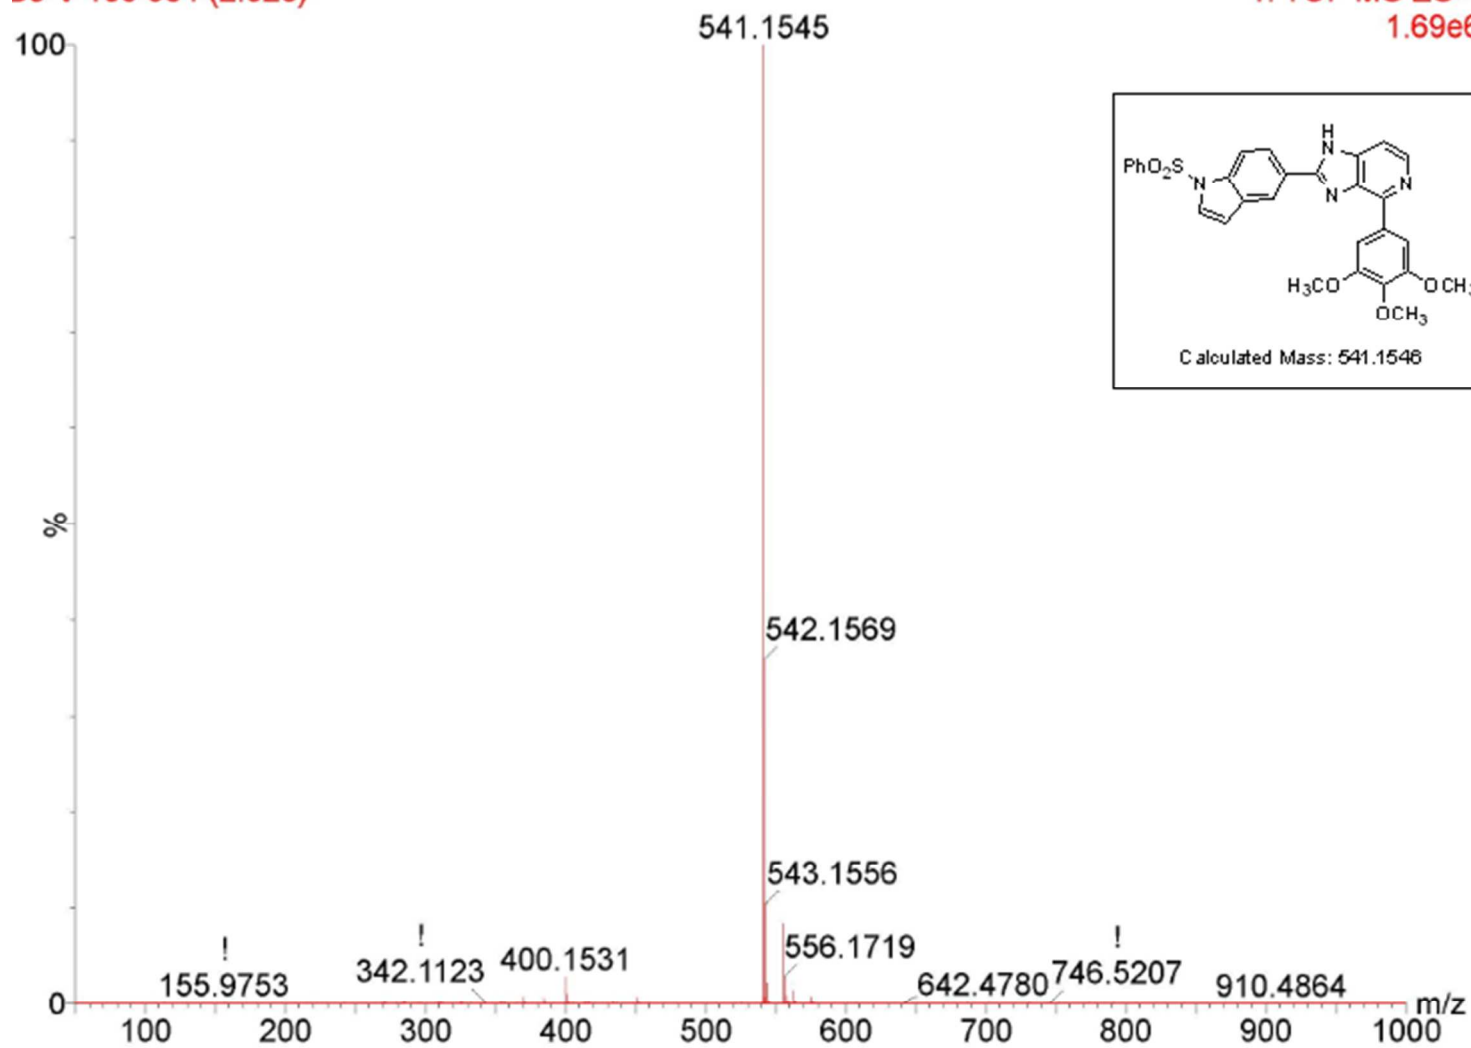

Compound **38**, 7-IIP-SO<sub>2</sub>Ph: **HRMS** Analysis

DJV47 33 (0.308)

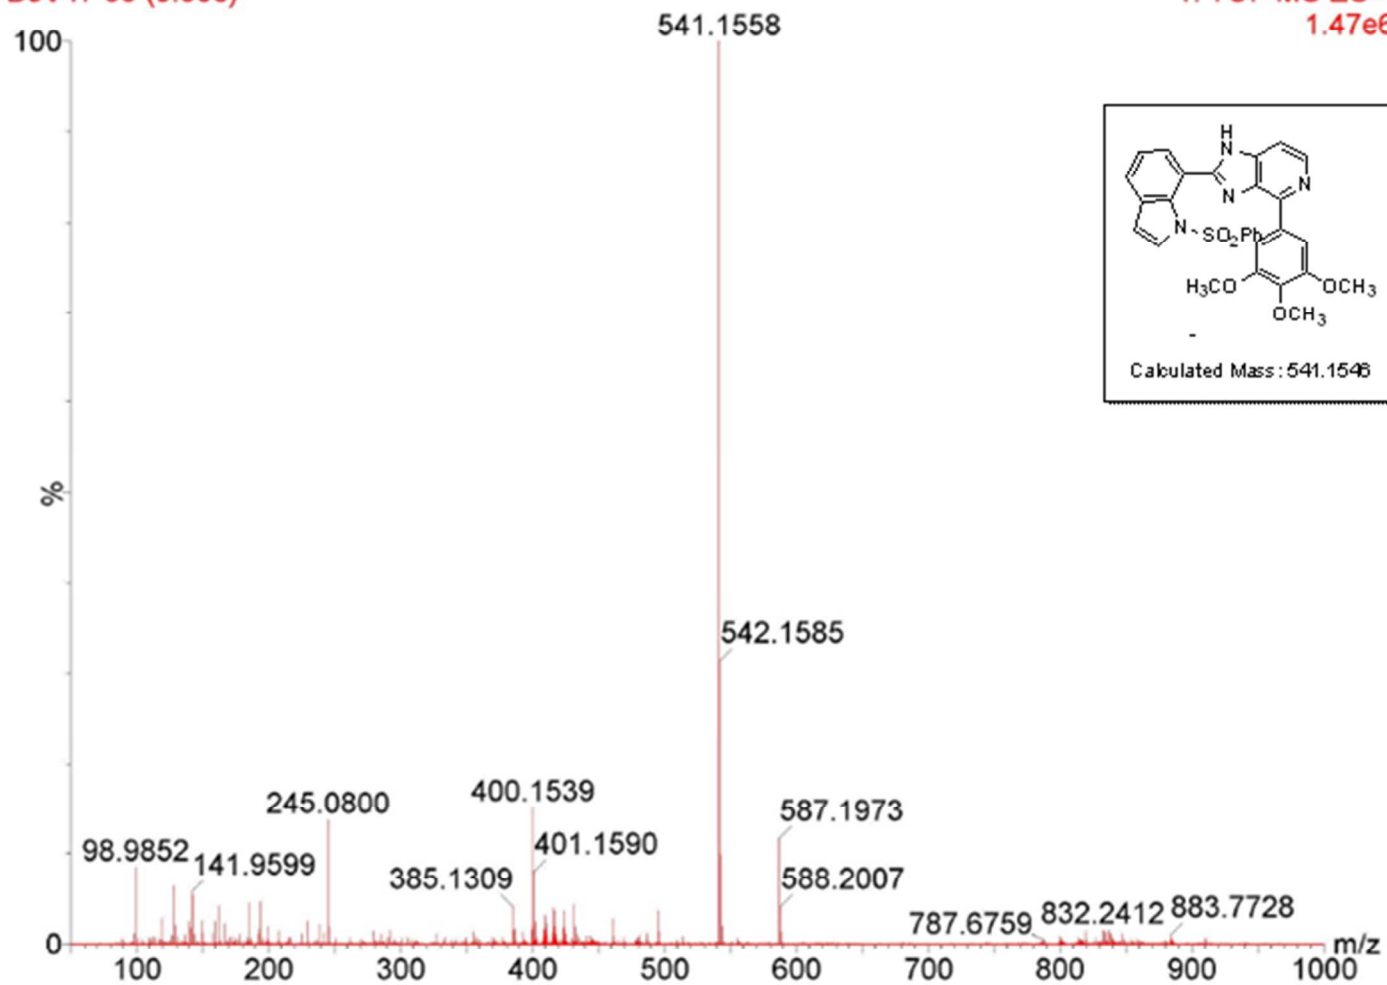

1: TOF MS ES+  
1.47e6

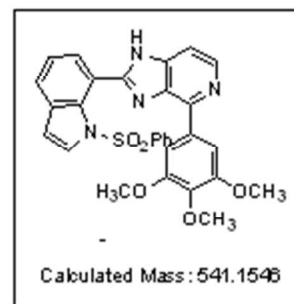

Supplement: ml5b00208_si_001.pdf [file ml5b00208_si_001.pdf]
